# Supplementary material for: Synthesis of triarylborane-centered N-heterocyclic carbene cages with tunable photophysical properties
Source: Royal Society of Chemistry journal article supplement (doi:10.1039/d2cc06584c), 2023-01-01
Supplement: d2cc06584c1.pdf [file d2cc06584c1.pdf]

# **Synthesis of Triarylborane-Centered N-Heterocyclic Carbene Cages with Tunable Photophysical Properties**

Yi-Fan Zhang, Ya-Wen Zhang, Xin Li, Li-Ying Sun\* and Ying-Feng Han\*

*Key Laboratory of Synthetic and Natural Functional Molecule Chemistry of the  
Ministry of Education, Xi'an Key Laboratory of Functional Supramolecular Structure  
and Materials, College of Chemistry and Materials Science, Northwest University,  
Xi'an 710127, P. R. China*

**Supporting Information**

## Table of Contents:

|                                                                                              |     |
|----------------------------------------------------------------------------------------------|-----|
| 1. Materials and methods                                                                     | S1  |
| 2. Synthesis of the triarylborane-bridged NHC precursor and trinuclear hexacarbene complexes | S2  |
| 3. X-ray diffraction analysis of $[\text{Ag}_3(\mathbf{1})_2](\text{PF}_6)_3$                | S14 |
| 4. Table of photophysical data                                                               | S17 |
| 5. DFT calculation                                                                           | S18 |
| 6. $\text{F}^-$ binding investigations                                                       | S29 |
| 7. References                                                                                | S30 |

## 1. Materials and methods

All starting materials were used as received from commercial sources unless otherwise stated, while solvents were freshly distilled by standard procedures before use. All the reagents were of analytical grade. Bis(pinacolato)diboron, Pd(dppf)Cl<sub>2</sub>, 5-bromo-2-pyridinecarboxaldehyde, and 2,4,6-trimethylaniline were obtained from Bide Pharmatech Co., Ltd. Pd(PPh<sub>3</sub>)<sub>4</sub> and paraformaldehyde were obtained from Energy Chemical. Ag<sub>2</sub>O was purchased from Shanghai Aladdin biochemical Technology Co., Ltd. All reactions and manipulations were performed under a nitrogen atmosphere, using standard Schlenk techniques. However, once the reactions were completed, subsequent workups were done without precaution, as the compounds are airstable. The <sup>1</sup>H, <sup>13</sup>C{<sup>1</sup>H} and 2D NMR spectra were recorded on Bruker AVANCE III 400 or AVANCE III 600 spectrometers. Chemical shifts for <sup>1</sup>H, <sup>13</sup>C{<sup>1</sup>H} and 2D NMR were reported in ppm on the  $\delta$  scale; <sup>1</sup>H and <sup>13</sup>C{<sup>1</sup>H} were referenced to the solvent residual peak. Coupling constants (*J*) are reported in hertz (Hz). Mass spectra were obtained with a Bruker microTOF-Q II mass spectrometer (Bruker Daltonics Corp., USA) or a Synapt G2 ESI-Q-TOF mass spectrometer in the electrospray ionization (ESI) mode.

## 2. Synthesis of the triarylborane-bridged NHC precursor and trinuclear hexacarbene complexes

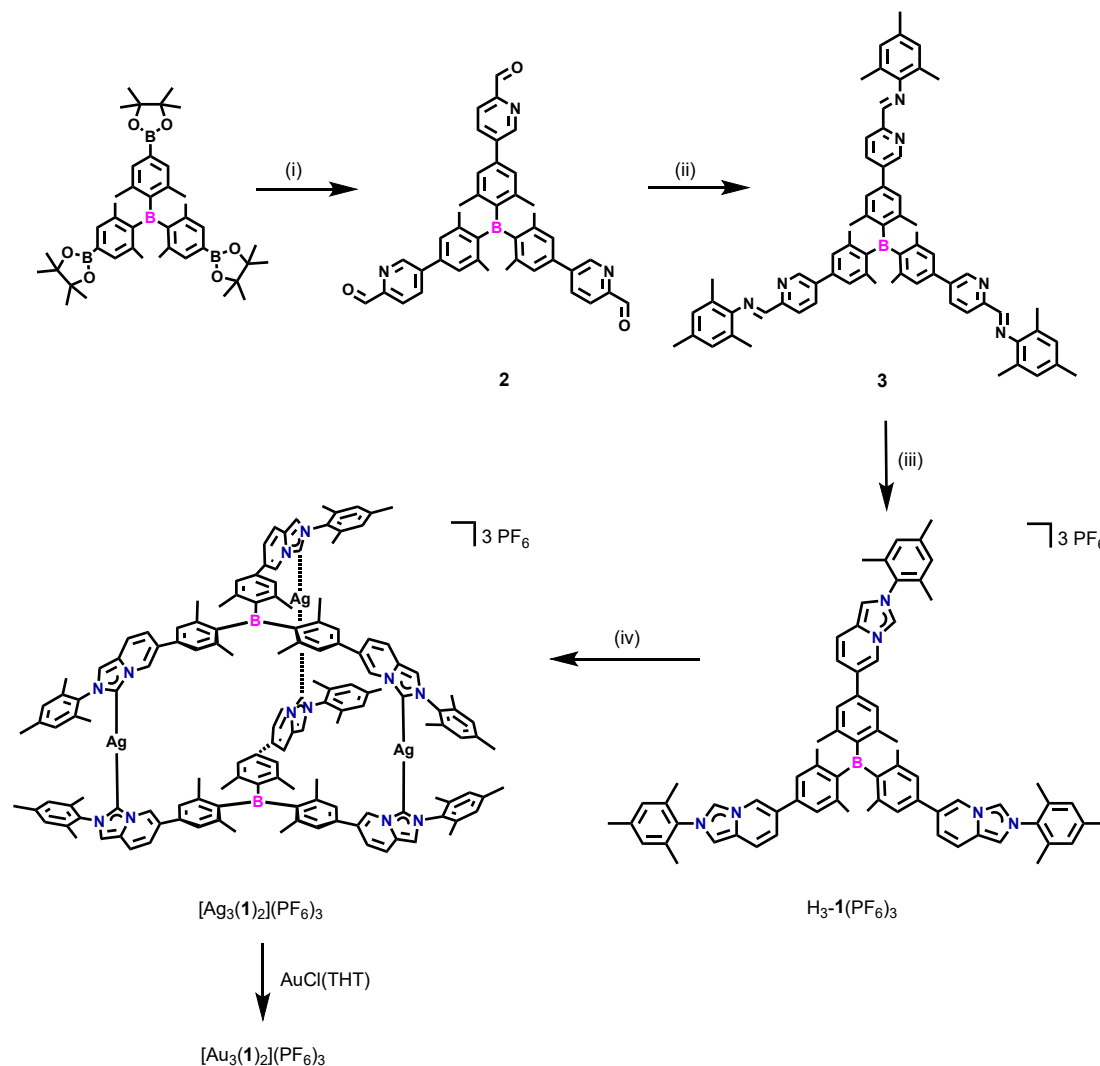

**Scheme S1** Synthesis of the triarylborane-bridged NHC precursor  $H_3-1(PF_6)_3$  and trinuclear hexacarbene complexes  $[M_3(1)_2](PF_6)_3$  ( $M = Ag, Au$ ). (i) 5-bromo-2-pyridinecarboxaldehyde,  $K_2CO_3$ ,  $Pd(PPh_3)_4$ , DMF,  $110\text{ }^\circ C$ ; (ii) 2,4,6-trimethylaniline,  $CHCl_3/EtOH$ ,  $CH_3COOH$ , reflux; (iii) (a) paraformaldehyde,  $HCl$ ,  $25\text{ }^\circ C$ ; (b)  $NH_4PF_6$ ,  $MeOH$ ,  $25\text{ }^\circ C$ ; (iv)  $Ag_2O$ ,  $CH_3CN$ ,  $55\text{ }^\circ C$ .

## 2.1 Synthesis of the boronate ester compound

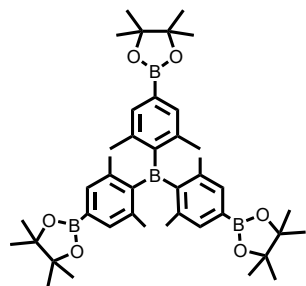

Tris(4-bromo-2,6-dimethylphenyl)borane (3.30 g, 5.86 mmol), bis(pinacolato)diboron (5.36 g, 21.11 mmol), CH<sub>3</sub>COOK (6.91 g, 70.37 mmol) and Pd(dppf)Cl<sub>2</sub> (0.43 g, 0.59 mmol) were dissolved in anhydrous 1,4-dioxane (120 mL) and stirred under N<sub>2</sub> atmosphere at 110 °C for 4 d. The resulting mixture was diluted with dichloromethane (200 mL) and washed with water (100 mL × 2) and brine (50 mL). The combined organic layers were dried by MgSO<sub>4</sub> and evaporated. The crude product was purified by column chromatography on silica gel (petroleum ether/ethyl acetate = 10:1 to 5:1) to give the boronate ester compound as a white solid. Yield: 57% (2.34 g, 3.32 mmol). <sup>1</sup>H NMR (400 MHz, CDCl<sub>3</sub>): δ = 7.33 (s, 6H), 2.00 (s, 18H), 1.35 (s, 36H) ppm. The <sup>1</sup>H NMR spectrum of the boronate ester compound showed clear agreement with the one in the literature.<sup>S1</sup>

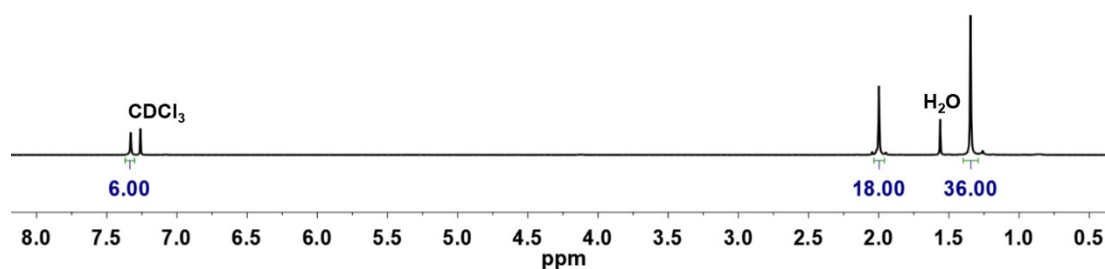

**Fig. S1** <sup>1</sup>H NMR spectrum (400 MHz, CDCl<sub>3</sub>) of the boronate ester compound.

## 2.2 Synthesis of compound 2

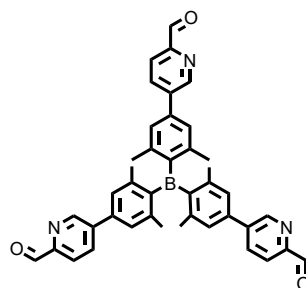

A mixture of the boronate ester compound (1.34 g, 1.90 mmol), 5-bromo-2-pyridinecarboxaldehyde (1.59 g, 8.56 mmol), K<sub>2</sub>CO<sub>3</sub> (4.20 g, 30.40 mmol), Pd(PPh<sub>3</sub>)<sub>4</sub> (0.66 g, 0.57 mmol) in anhydrous DMF (80 mL) was degassed and stirred under N<sub>2</sub> atmosphere at 110 °C for 24 h. The solvent was removed under reduced pressure and the solid residue was triturated with water, collected by filtration, and washed with water (3 × 30 mL), diethyl ether (2 × 10 mL), and *n*-hexane (2 × 10 mL). The crude product was purified by column chromatography

on silica gel (dichloromethane/ethyl acetate = 10:1 to 6:1) to give compound **2** as a pale yellow solid. Yield: 33% (0.40 g, 0.62 mmol).  $^1\text{H NMR}$  (400 MHz,  $\text{CDCl}_3$ ):  $\delta$  = 10.13 (s, 3H), 9.06 (d,  $J$  = 1.7 Hz, 3H), 8.11 (m, 3H), 8.04 (m, 3H), 7.29 (s, 6H), 2.20 (s, 18H) ppm. The  $^1\text{H NMR}$  spectrum of the compound **2** showed clear agreement with the one in the literature.<sup>S2</sup>

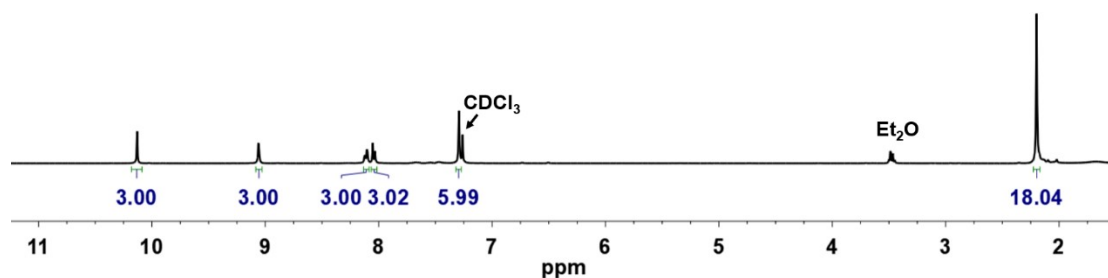

**Fig. S2**  $^1\text{H NMR}$  spectrum (400 MHz,  $\text{CDCl}_3$ ) of compound **2**.

### 2.3 Synthesis of compound **3**

A mixture of compound **2** (0.10 g, 0.16 mmol) was dissolved in chloroform (30 mL) and ethanol (10 mL) and then 2,4,6-trimethylaniline (0.20 mL, 1.41 mmol) and glacial acetic acid (3  $\mu\text{L}$ , 0.053 mmol) were added. The mixture was refluxed for 30 h. The solvent was removed in vacuo and the residue was washed with methanol yielding **3**, as a yellow micro-crystalline powder. The sample was not stable, so the next step was directly carried out without further purification.

### 2.4 Synthesis of compound **H<sub>3</sub>-1(PF<sub>6</sub>)<sub>3</sub>**

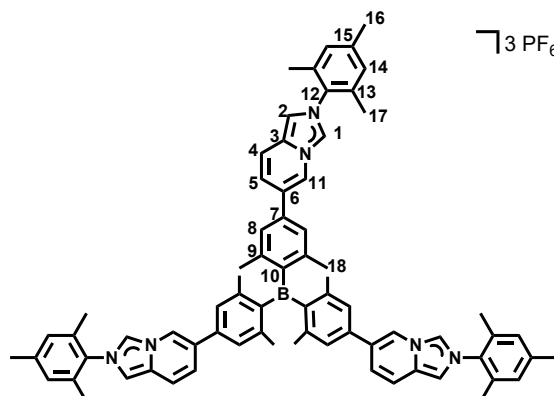

$\text{3 PF}_6$  Paraformaldehyde (0.053 g, 0.59 mmol) was dissolved in hot toluene (30 mL) and compound **3** (0.10 g, 0.16 mmol) was added. A solution of 4 M HCl in 1,4-dioxane was added dropwise, whereupon a light-yellow precipitate formed immediately. After stirring for 18 h at

ambient temperature, the precipitate was filtered and washed twice with diethyl ether

(2 × 2 mL). To remove unreacted paraformaldehyde, the residue was dissolved in methanol and filtered. Then, a solution of NH<sub>4</sub>PF<sub>6</sub> was added and the mixture was stirred for 15 h at ambient temperature to precipitate compound H<sub>3</sub>-**1**(PF<sub>6</sub>)<sub>3</sub> as an off-white solid. Yield: 51% (0.12 g, 0.082 mmol). <sup>1</sup>H NMR (600 MHz, CD<sub>3</sub>CN): δ = 9.15 (s, 3H, H1), 8.67 (s, 3H, H11), 7.93 (d, *J* = 9.7 Hz, 3H, H4), 7.90 (s, 3H, H2), 7.71 (d, *J* = 9.7 Hz, 3H, H5), 7.43 (s, 6H, H8), 7.17 (s, 6H, H14), 2.39 (s, 9H, H16), 2.22 (s, 18H, H18), 2.05 (s, 18H, H17) ppm. <sup>13</sup>C{<sup>1</sup>H} NMR (150 MHz, CD<sub>3</sub>CN): δ = 148.1 (C10), 142.9 (C9), 142.5 (C15), 137.4 (C7), 135.6 (C13), 132.4 (C12), 132.0 (C6), 130.8 (C3), 130.4 (C14), 127.3 (C1), 127.2 (C8), 127.0 (C5), 121.9 (C11), 119.5 (C4), 115.8 (C2), 23.3 (C18), 21.1 (C16), 17.3 (C17) ppm. HRMS (ESI, positive ions): *m/z* = 588.2543 (calcd for [H<sub>3</sub>-**1**(PF<sub>6</sub>)<sub>2</sub>]<sup>2+</sup> 588.2777).

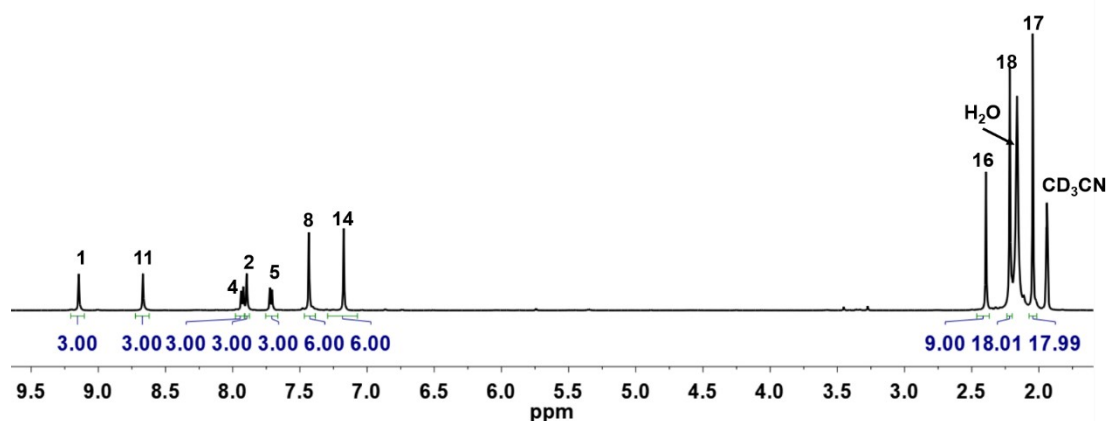

**Fig. S3** <sup>1</sup>H NMR spectrum (600 MHz, CD<sub>3</sub>CN) of H<sub>3</sub>-**1**(PF<sub>6</sub>)<sub>3</sub>.

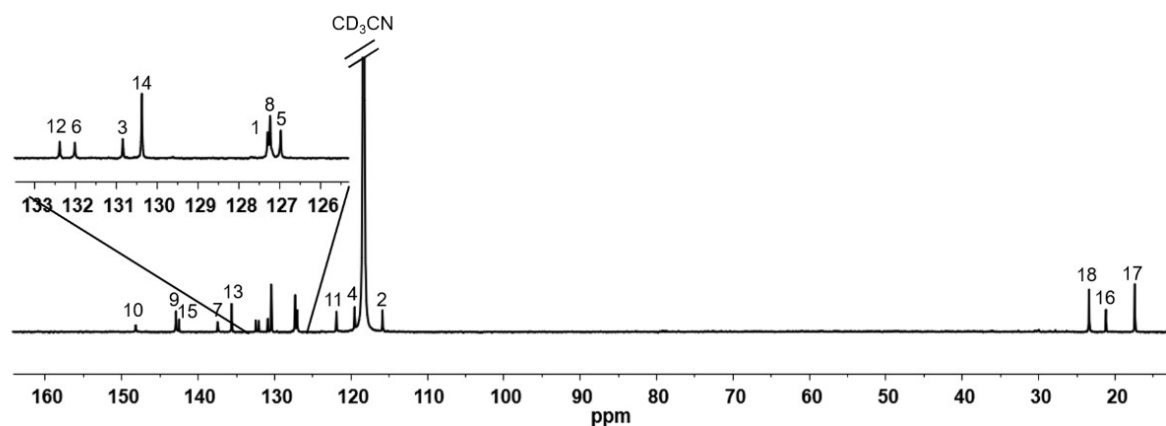

**Fig. S4** <sup>13</sup>C{<sup>1</sup>H} NMR spectrum (150 MHz, CD<sub>3</sub>CN) of H<sub>3</sub>-**1**(PF<sub>6</sub>)<sub>3</sub>.

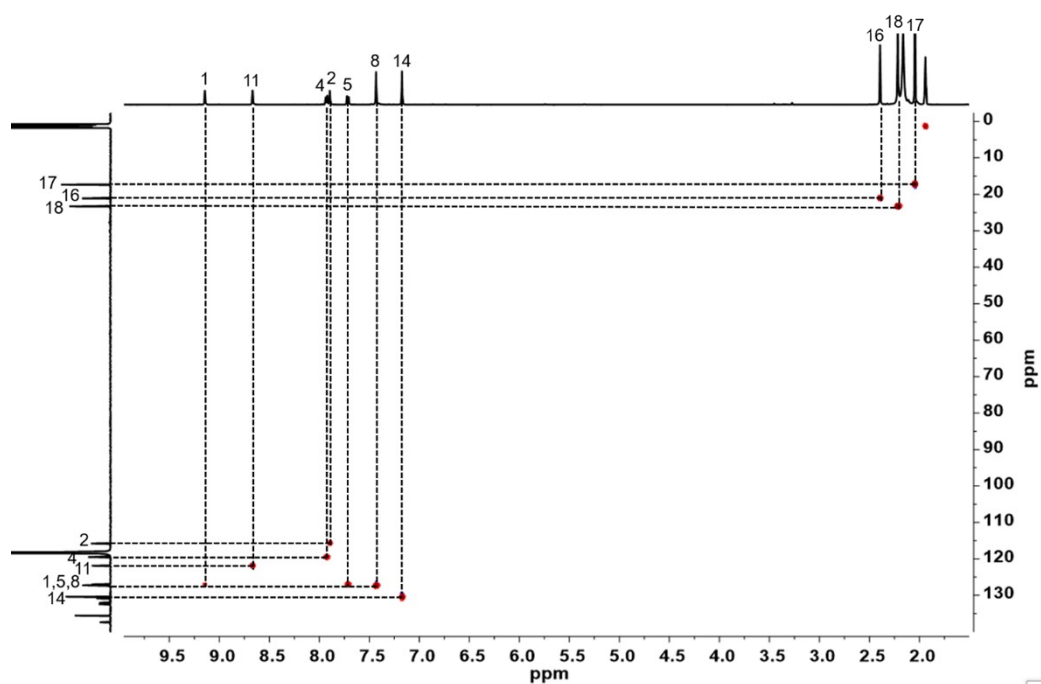

**Fig. S5**  $^1\text{H}$ - $^{13}\text{C}$  HSQC spectrum (600 MHz,  $\text{CD}_3\text{CN}$ ) of  $\text{H}_3\text{-1}(\text{PF}_6)_3$ .

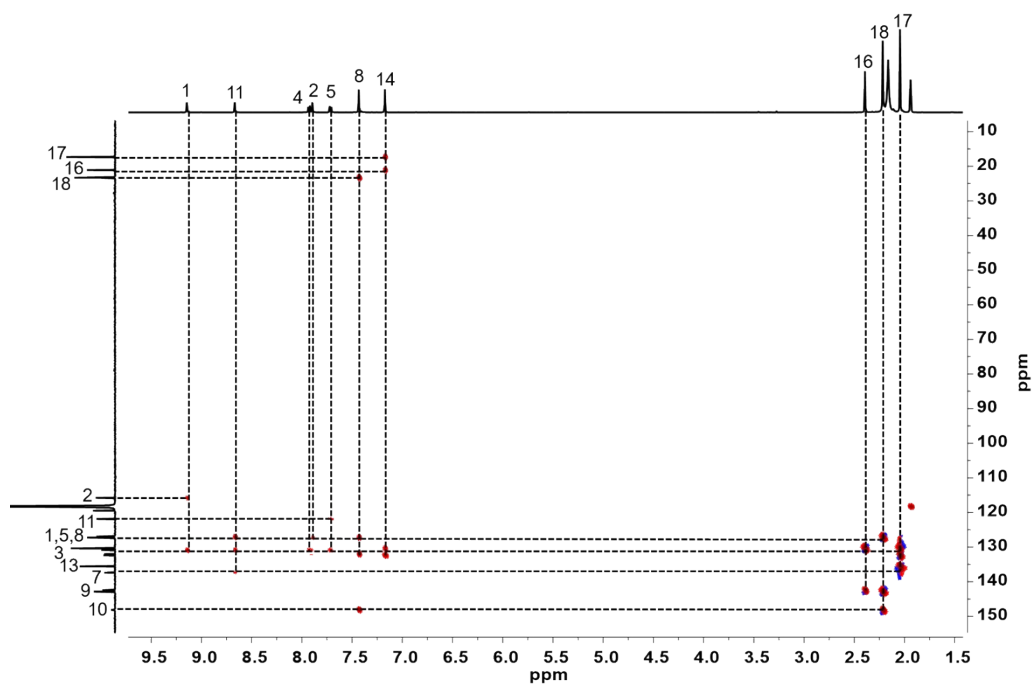

**Fig. S6**  $^1\text{H}$ - $^{13}\text{C}$  HMBC spectrum (600 MHz,  $\text{CD}_3\text{CN}$ ) of  $\text{H}_3\text{-1}(\text{PF}_6)_3$ .



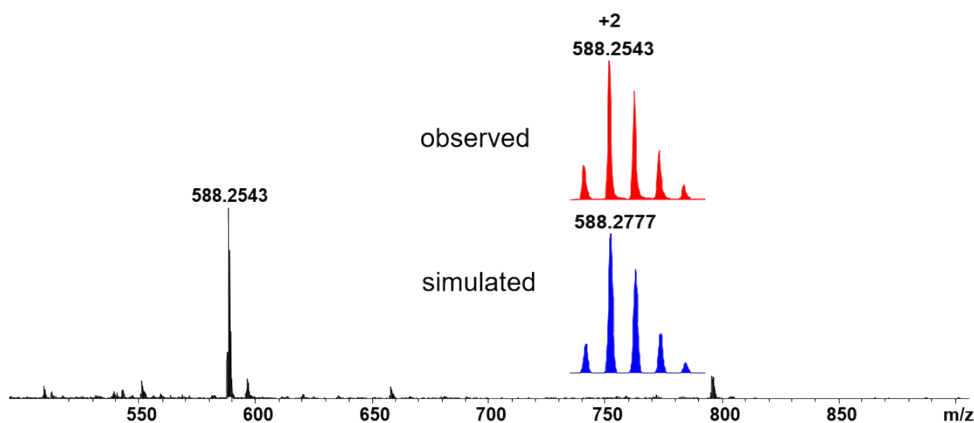

**Fig. S7** HR-ESI mass spectrum (positive ions) of  $H_3-1(PF_6)_3$  (Insert: experimentally observed distribution on top and simulated distribution at the bottom).

### 2.5 Synthesis of complex $[Ag_3(1)_2](PF_6)_3$

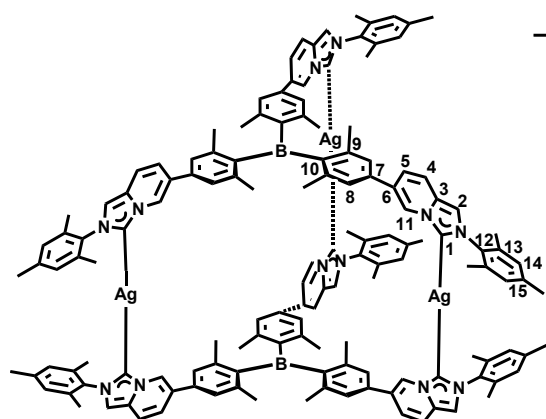

Under a nitrogen atmosphere, a sample of  $H_3-1(PF_6)_3$  (0.030 g, 0.020 mmol) was dissolved in dry acetonitrile (20 mL) and  $Ag_2O$  (0.022 g, 0.092 mmol) was added to this solution. The resulting suspension was heated at 55 °C for 14 h under the exclusion of light.

After cooling the mixture to ambient temperature, the obtained suspension was filtered through a pad of Celite to give a clear solution. The filtrate was concentrated to 3 mL and then adding diethyl ether (30 mL) resulted in the precipitation of a pale yellow solid. The precipitate was filtered, washed with diethyl ether, and dried in vacuo. Yield: 96% (0.027 g, 0.0096 mmol).  $^1H$  NMR (600 MHz,  $CD_3CN$ ):  $\delta$  = 9.18 (s, 6H, H11), 7.65 (m, 12H, H4, H5), 7.46 (s, 6H, H2), 7.03 (s, 12H, H8), 6.92 (s, 12H, H14), 2.49 (s, 18H,  $CH_3$ ), 2.15 (s, 36H,  $CH_3$ ), 1.87 (s, 18H,  $CH_3$ ), 1.60 (s, 18H,  $CH_3$ ) ppm.  $^{13}C\{^1H\}$  NMR (150 MHz,  $CD_3CN$ ):  $\delta$  = 175.8 (C1), 147.7 (C10), 140.2 (C15), 136.8 (C13), 136.5 (C9), 135.3 (C12), 135.0 (C7), 131.3 (C3), 130.4 (C14), 129.7 (C8), 126.2 (C11), 125.8 (C6), 123.1 (C5), 119.0 (C4), 114.7 (C2), 23.8 ( $CH_3$ ), 21.3 ( $CH_3$ ), 17.5 ( $CH_3$ ), 17.1 ( $CH_3$ ) ppm.  $^{19}F$  NMR (376 MHz,  $CD_3CN$ ):  $\delta$  = -73.76 ppm.  $^{31}P$  NMR (162 MHz,

CD<sub>3</sub>CN):  $\delta = -144.58$  ppm. HRMS (ESI, positive ions):  $m/z = 793.9169$  (calcd for [Ag<sub>3</sub>(**1**)<sub>2</sub>]<sup>3+</sup> 793.9517).

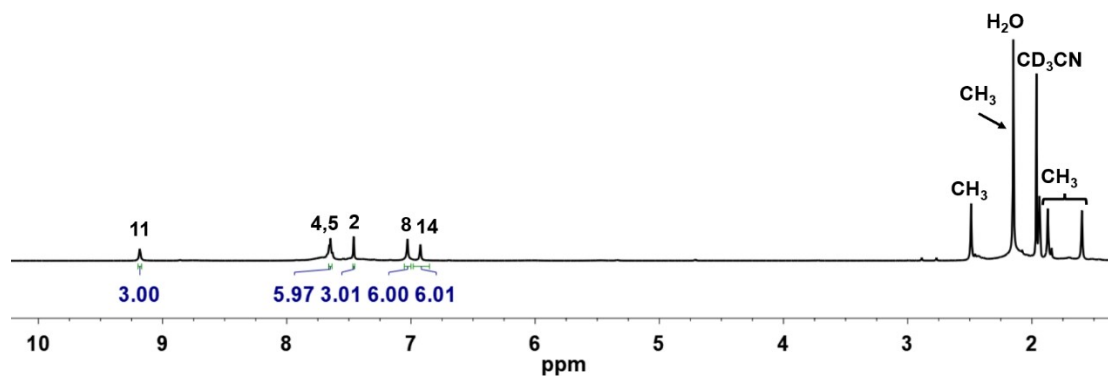

**Fig. S8** <sup>1</sup>H NMR spectrum (600 MHz, CD<sub>3</sub>CN) of [Ag<sub>3</sub>(**1**)<sub>2</sub>](PF<sub>6</sub>)<sub>3</sub>.

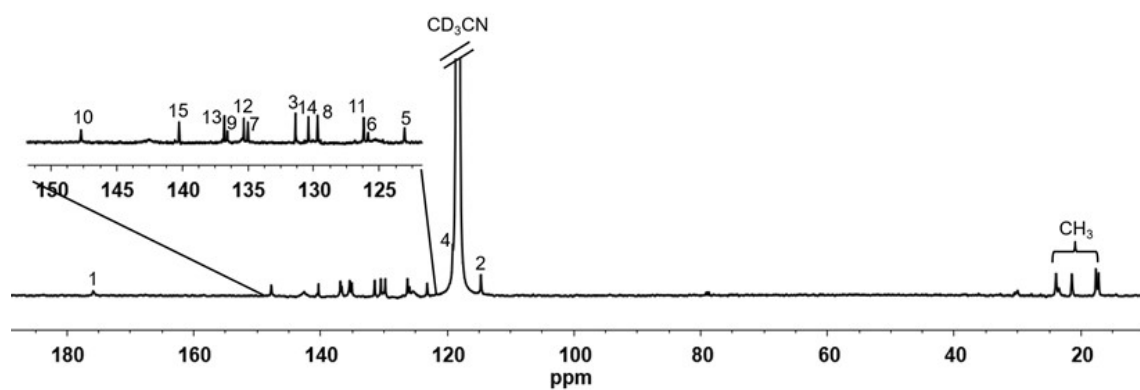

**Fig. S9** <sup>13</sup>C {<sup>1</sup>H} NMR spectrum (150 MHz, CD<sub>3</sub>CN) of [Ag<sub>3</sub>(**1**)<sub>2</sub>](PF<sub>6</sub>)<sub>3</sub>.

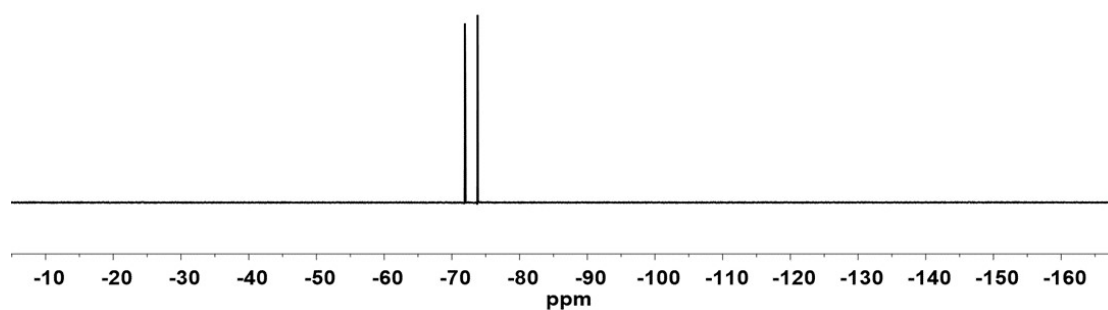

**Fig. S10** <sup>19</sup>F NMR spectrum (376 MHz, CD<sub>3</sub>CN) of [Ag<sub>3</sub>(**1**)<sub>2</sub>](PF<sub>6</sub>)<sub>3</sub>.

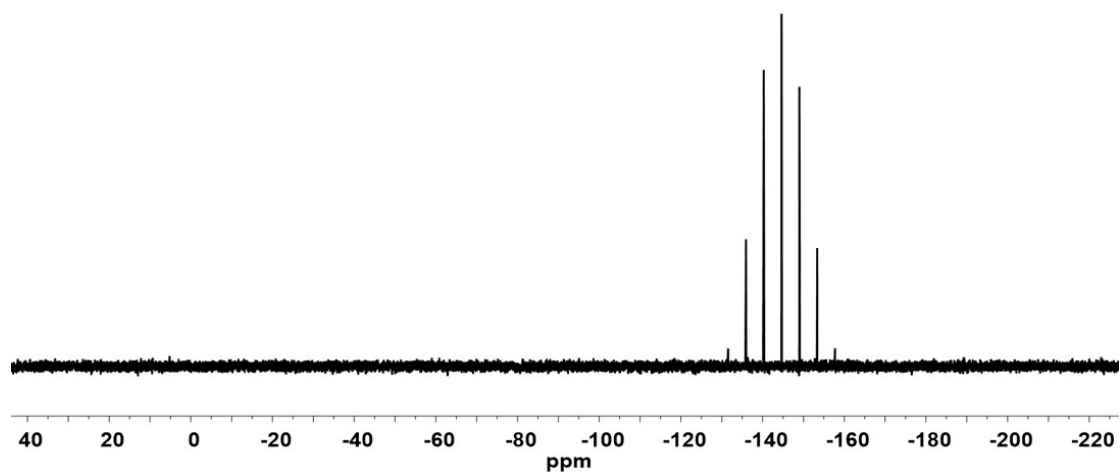

**Fig. S11**  $^{31}\text{P}$  NMR spectrum (162 MHz,  $\text{CD}_3\text{CN}$ ) of  $[\text{Ag}_3(\mathbf{1})_2](\text{PF}_6)_3$ .

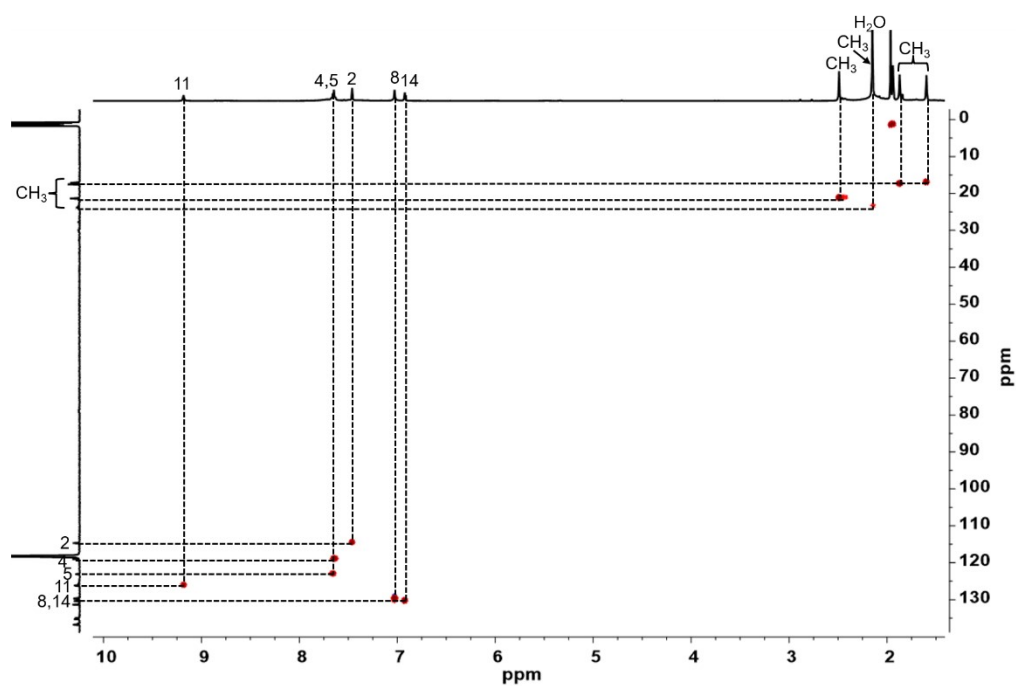

**Fig. S12**  $^1\text{H}$ - $^{13}\text{C}$  HSQC spectrum (600 MHz,  $\text{CD}_3\text{CN}$ ) of  $[\text{Ag}_3(\mathbf{1})_2](\text{PF}_6)_3$ .

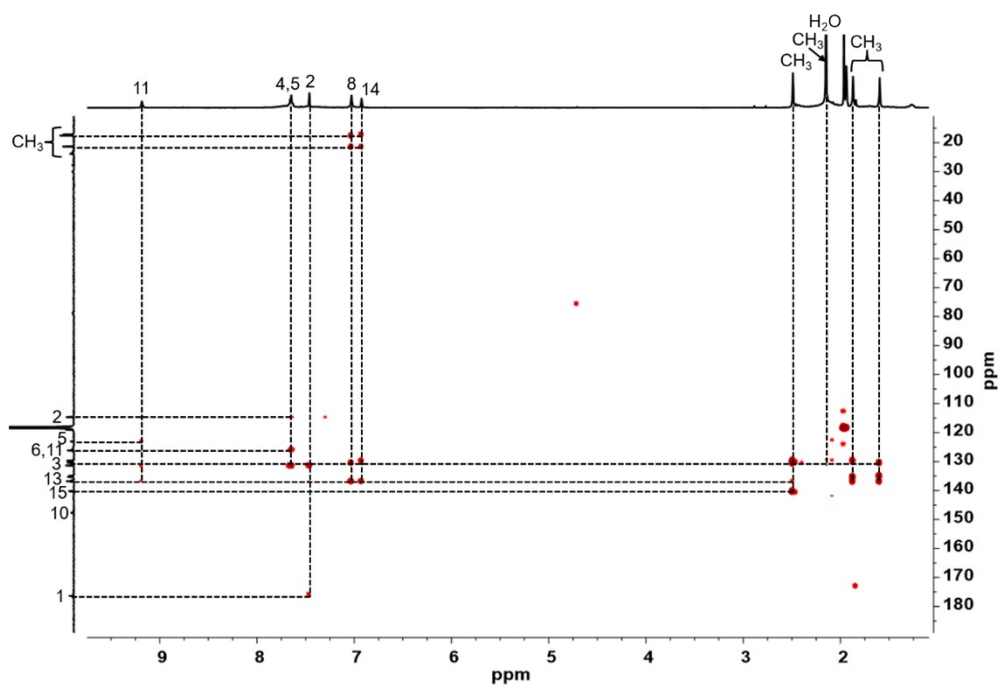

**Fig. S13**  $^1\text{H}$ - $^{13}\text{C}$  HMBC spectrum (600 MHz,  $\text{CD}_3\text{CN}$ ) of  $[\text{Ag}_3(\mathbf{1})_2](\text{PF}_6)_3$ .

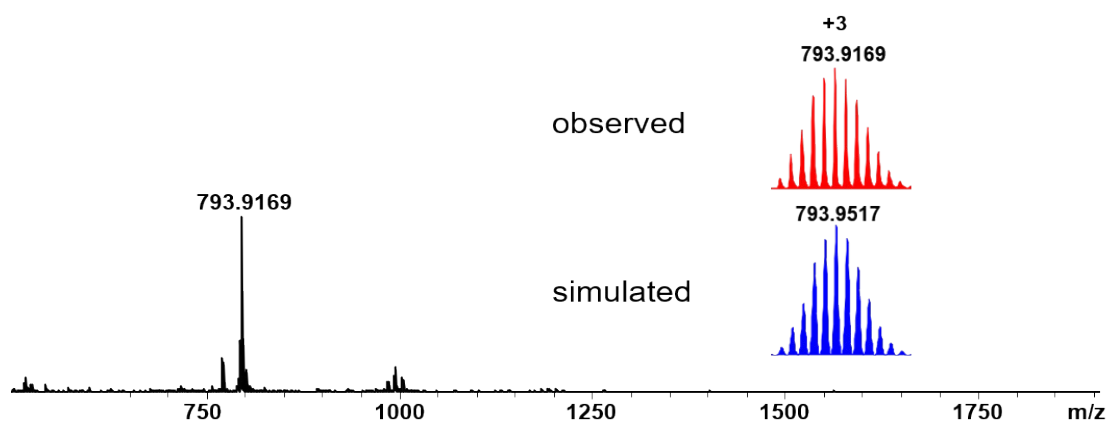

**Fig. S14** HR-ESI mass spectrum (positive ions) of  $[\text{Ag}_3(\mathbf{1})_2](\text{PF}_6)_3$  (Insert: experimentally observed distribution on top and simulated distribution at the bottom).

## 2.6 Synthesis of complex $[\text{Au}_3(\mathbf{1})_2](\text{PF}_6)_3$

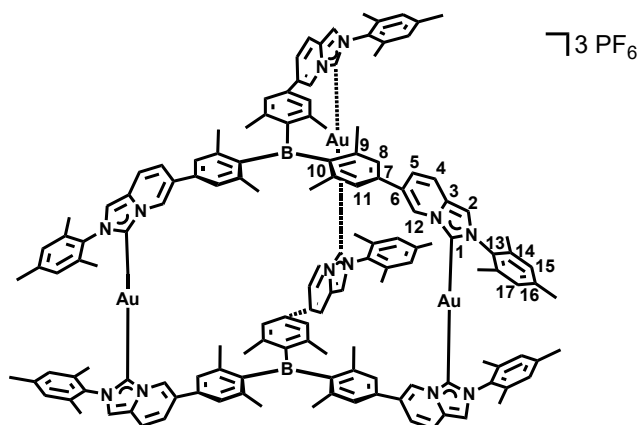

Under a nitrogen atmosphere, a sample of  $[\text{Ag}_3(\mathbf{1})_2](\text{PF}_6)_3$  (0.030 g, 0.011 mmol) was dissolved in dry acetonitrile (20 mL) and to this solution was added  $[\text{AuCl}(\text{THT})]$  (0.020 g, 0.036 mmol). The reaction mixture was stirred at ambient

temperature for 24 h and then slowly filtered through a pad of celite until a clear filtrate was obtained. The filtrate was concentrated to 2 mL, and diethyl ether (20 mL) was added. A purple precipitate formed, which was isolated by filtration, and washed with diethyl ether and dried in vacuo to afford the complex of  $[\text{Au}_3(\mathbf{1})_2](\text{PF}_6)_3$ . Yield: 83% (0.028 g, 0.0091 mmol).  $^1\text{H}$  NMR (400 MHz,  $\text{CD}_3\text{CN}$ ):  $\delta$  = 9.28 (s, 6H), 7.84 (s, 6H), 7.68 (m, 12H), 7.60 (s, 6H), 7.46 (s, 6H), 7.03 (s, 6H), 6.93 (s, 6H), 2.49 (s, 18H,  $\text{CH}_3$ ), 2.34 (s, 18H,  $\text{CH}_3$ ), 1.89 (s, 36H,  $\text{CH}_3$ ), 1.55 (s, 18H,  $\text{CH}_3$ ) ppm.  $^{13}\text{C}\{^1\text{H}\}$  NMR (150 MHz,  $\text{CD}_3\text{CN}$ ):  $\delta$  = 178.2 (C1), 147.5 (C7), 143.3 (C13), 141.3 (C16), 140.2 (C17), 135.9 (C14), 135.7 (C9), 134.5 (C10), 130.7 (C3), 130.2 (C6), 129.3 (C15), 125.9 (C11), 125.5 (C8), 124.4 (C12), 123.1 (C5), 118.8 (C4), 114.5 (C2), 23.4 ( $\text{CH}_3$ ), 21.0 ( $\text{CH}_3$ ), 17.3 ( $\text{CH}_3$ ), 16.8 ( $\text{CH}_3$ ) ppm.  $^{19}\text{F}$  NMR (376 MHz,  $\text{CD}_3\text{CN}$ ):  $\delta$  = -73.75 ppm.  $^{31}\text{P}$  NMR (162 MHz,  $\text{CD}_3\text{CN}$ ):  $\delta$  = -144.69 ppm. HRMS (ESI, positive ions):  $m/z$  = 883.0296 (calcd for  $[\text{Au}_3(\mathbf{1})_2]^{3+}$  883.0129).

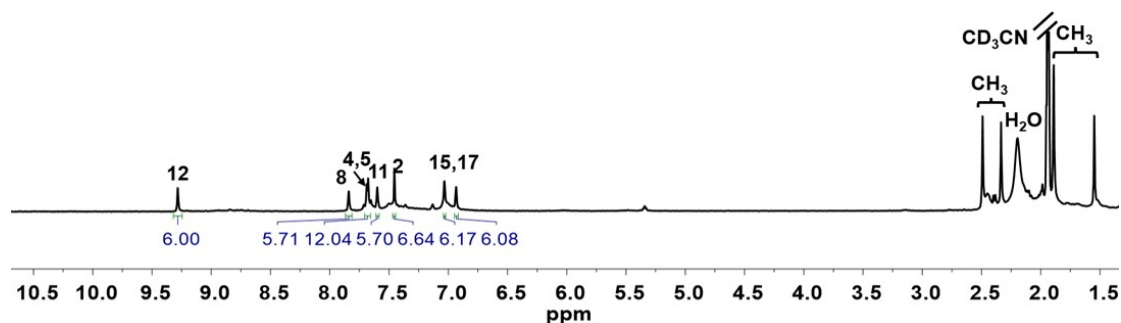

**Fig. S15**  $^1\text{H}$  NMR spectrum (400 MHz,  $\text{CD}_3\text{CN}$ ) of  $[\text{Au}_3(\mathbf{1})_2](\text{PF}_6)_3$ .

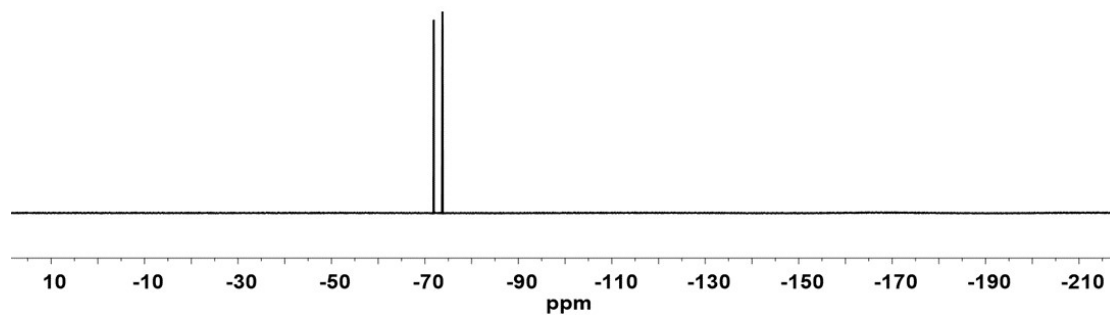

**Fig. S16**  $^{19}\text{F}$  NMR spectrum (376 MHz,  $\text{CD}_3\text{CN}$ ) of  $[\text{Au}_3(\mathbf{1})_2](\text{PF}_6)_3$ .

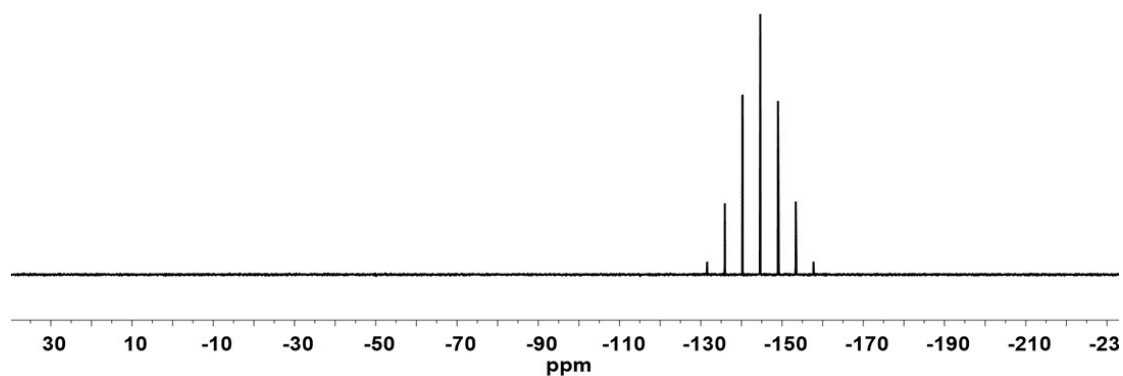

**Fig. S17**  $^{31}\text{P}$  NMR spectrum (162 MHz,  $\text{CD}_3\text{CN}$ ) of  $[\text{Au}_3(\mathbf{1})_2](\text{PF}_6)_3$ .

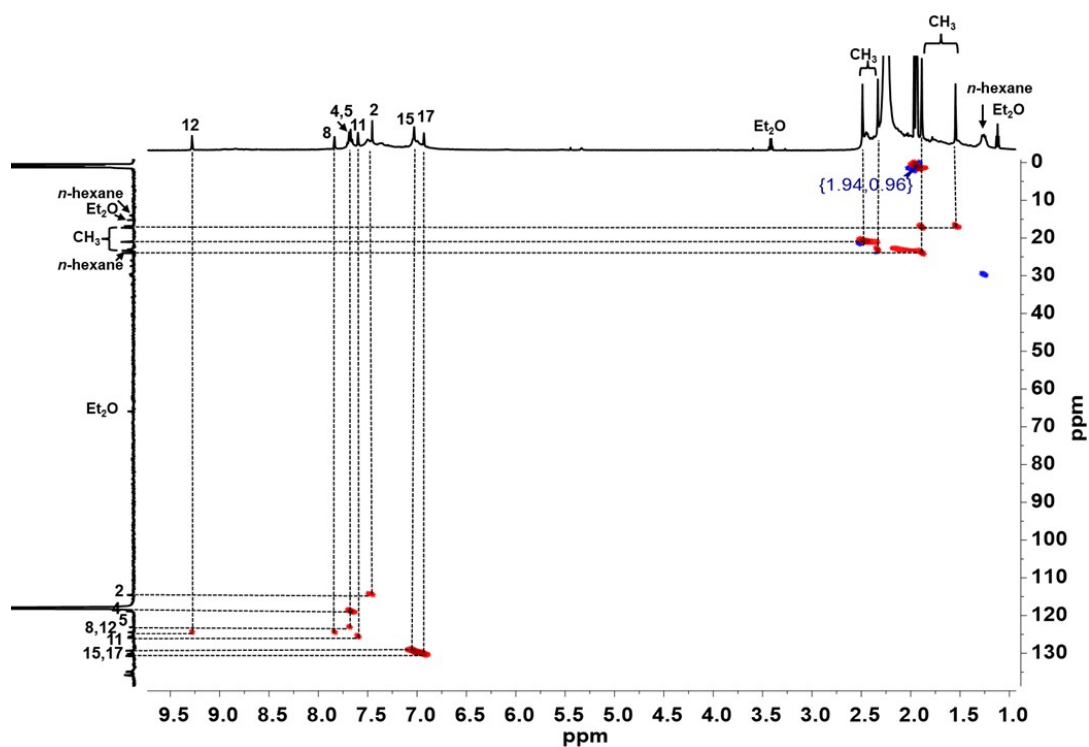

**Fig. S18**  $^1\text{H}$ - $^{13}\text{C}$  HSQC spectrum (600 MHz,  $\text{CD}_3\text{CN}$ ) of  $[\text{Au}_3(\mathbf{1})_2](\text{PF}_6)_3$ .

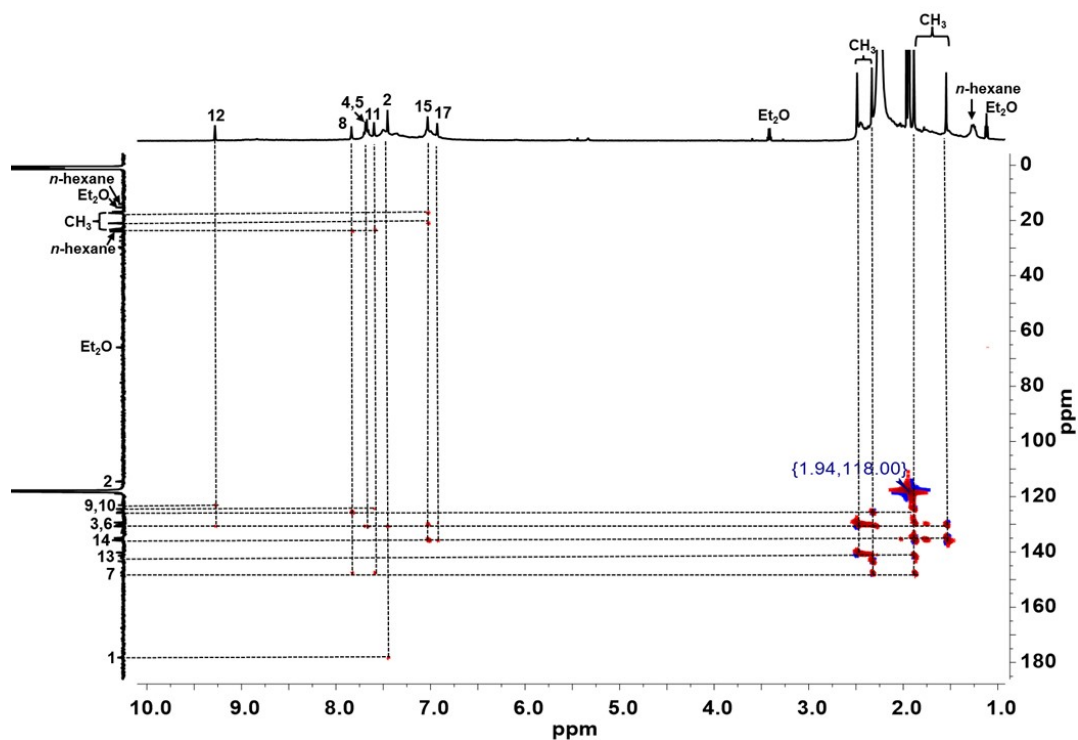

**Fig. S19**  $^1\text{H}$ - $^{13}\text{C}$  HMBC spectrum (600 MHz,  $\text{CD}_3\text{CN}$ ) of  $[\text{Au}_3(\mathbf{1})_2](\text{PF}_6)_3$ .

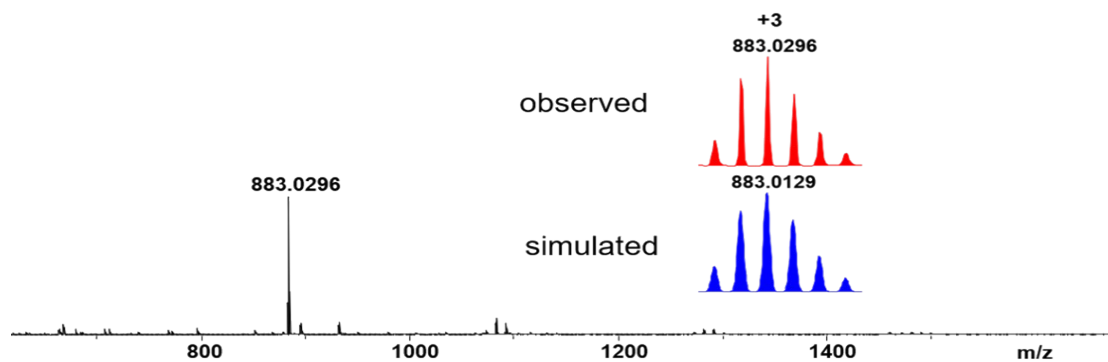

**Fig. S20** HR-ESI mass spectrum (positive ions) of  $[\text{Au}_3(\mathbf{1})_2](\text{PF}_6)_3$  (Insert: experimentally observed distribution on top and simulated distribution at the bottom).

### 3. X-ray diffraction analysis of $[\text{Ag}_3(\mathbf{1})_2](\text{PF}_6)_3$

#### Crystallographic details

Diffraction data of  $[\text{Ag}_3(\mathbf{1})_2](\text{PF}_6)_3$  was collected with a Bruker D8 VENTURE system X-ray diffractometer. Raw data collection and processing were performed with the APEX III software package. The data were corrected for absorption using the SADABS program.<sup>S3</sup> The structure was solved with the olex2 program package. Solve structure solution program using Charge Flipping and refined with the ShelXL refinement package using Least Squares minimization.<sup>S4,S5</sup> A number of disordered solvent molecules could not be restrained properly and were therefore removed using the SQUEEZE routine. Non-hydrogen atoms were refined anisotropically and hydrogen atoms were treated as idealized contributions. The crystal data of  $[\text{Ag}_3(\mathbf{1})_2](\text{PF}_6)_3$  and selected structural parameters are summarized in Table S1.



**Table S1** Crystal data of [Ag<sub>3</sub>(1)<sub>2</sub>](PF<sub>6</sub>)<sub>3</sub>

|                                                              |                                                                                                                 |
|--------------------------------------------------------------|-----------------------------------------------------------------------------------------------------------------|
| Empirical formula                                            | C <sub>144</sub> H <sub>138</sub> Ag <sub>3</sub> B <sub>2</sub> F <sub>18</sub> N <sub>12</sub> P <sub>3</sub> |
| Formula weight                                               | 2816.80                                                                                                         |
| Temperature/K                                                | 200.0                                                                                                           |
| Crystal system                                               | Monoclinic                                                                                                      |
| Space group                                                  | <i>C2/c</i>                                                                                                     |
| <i>a</i> /Å                                                  | 27.755(2)                                                                                                       |
| <i>b</i> /Å                                                  | 19.4743(14)                                                                                                     |
| <i>c</i> /Å                                                  | 29.186(2)                                                                                                       |
| $\alpha$ /°                                                  | 90                                                                                                              |
| $\beta$ /°                                                   | 90.276(2)                                                                                                       |
| $\gamma$ /°                                                  | 90                                                                                                              |
| Volume/Å <sup>3</sup>                                        | 15776(2)                                                                                                        |
| <i>Z</i>                                                     | 4                                                                                                               |
| $\rho_{\text{calc}}$ (g·cm <sup>-3</sup> )                   | 1.186                                                                                                           |
| $\mu$ (mm <sup>-1</sup> )                                    | 0.467                                                                                                           |
| <i>F</i> (000)                                               | 5776.0                                                                                                          |
| Crystal size/mm <sup>3</sup>                                 | 0.23 × 0.22 × 0.20                                                                                              |
| Radiation                                                    | Mo K $\alpha$ ( $\lambda$ = 0.71073)                                                                            |
| 2 $\theta$ range for data collection/°                       | 3.79 to 50.17                                                                                                   |
| Index ranges                                                 | -33 ≤ <i>h</i> ≤ 33, -23 ≤ <i>k</i> ≤ 23, -32 ≤ <i>l</i> ≤ 34                                                   |
| Reflections collected                                        | 136729                                                                                                          |
| Independent reflections                                      | 13938 [ <i>R</i> <sub>int</sub> = 0.1545, <i>R</i> <sub>sigma</sub> = 0.1018]                                   |
| Data/restraints/parameters                                   | 13938/563/893                                                                                                   |
| Goodness-of-fit on <i>F</i> <sup>2</sup>                     | 1.018                                                                                                           |
| Final <i>R</i> indexes [ <i>I</i> ≥ 2 $\sigma$ ( <i>I</i> )] | <i>R</i> <sub>1</sub> = 0.0955, <i>wR</i> <sub>2</sub> = 0.2307                                                 |
| Final <i>R</i> indexes [all data]                            | <i>R</i> <sub>1</sub> = 0.2049, <i>wR</i> <sub>2</sub> = 0.2923                                                 |
| Largest diff. peak/hole / e Å <sup>-3</sup>                  | 0.59/-0.49                                                                                                      |
| CCDC number                                                  | 2167062                                                                                                         |

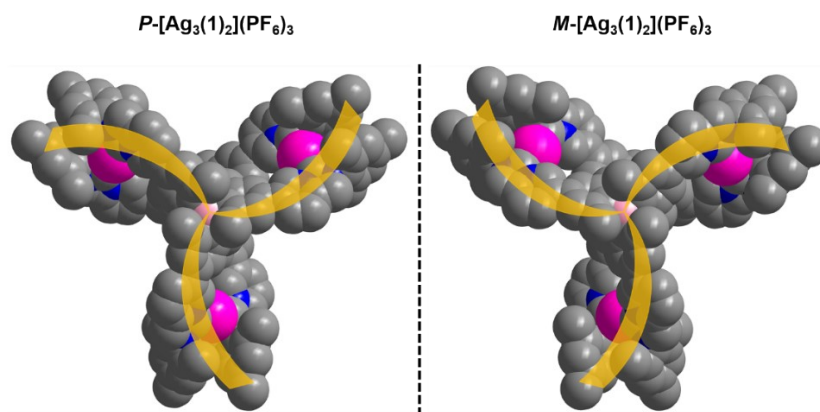

**Fig. S21** Space-filling depictions of the two isomers of  $[\text{Ag}_3(\mathbf{1})_2](\text{PF}_6)_3$ . Hydrogen atoms and anions are omitted for clarity.

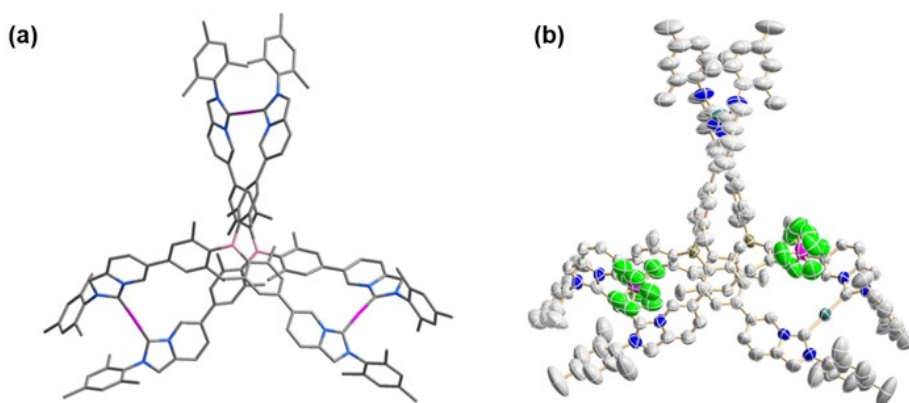

**Fig. S22** (a) Sticks and (b) thermal ellipsoid depictions of  $[\text{Ag}_3(\mathbf{1})_2](\text{PF}_6)_3$  at the 50% probability level. Hydrogen atoms are omitted for clarity.

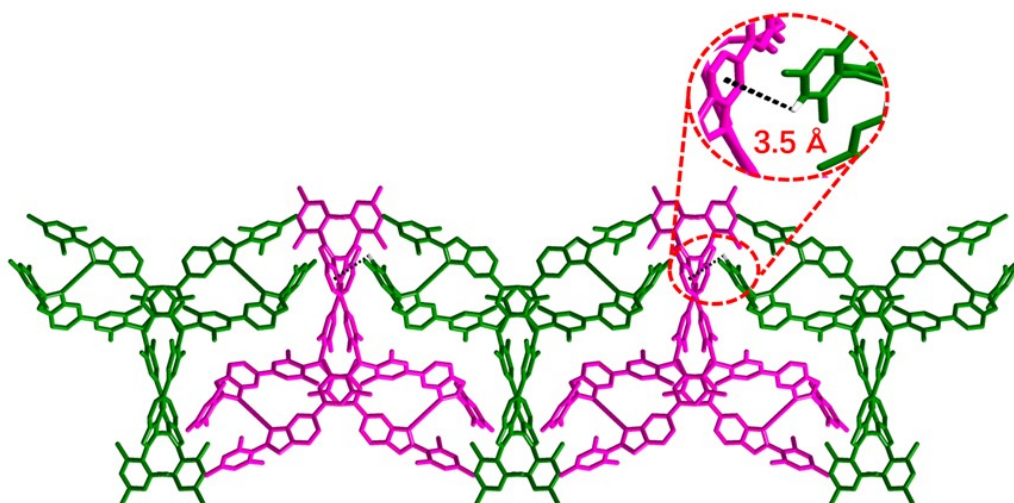

**Fig. S23** Five stacks of the trication  $[\text{Ag}_3(\mathbf{1})_2]^{3+}$  in  $[\text{Ag}_3(\mathbf{1})_2](\text{PF}_6)_3$ . Hydrogen atoms and anions are omitted for clarity.

#### 4. Table of photophysical data

The UV-vis experiments were conducted on an Agilent Cary-100 spectrophotometer. The fluorescence experiments were performed on a Horiba QM8000 spectrometer. The experimental quantum yields were determined by recording the emission signals within a K SPHERE-Petite on a Horiba QM 8000 spectrometer equipped with a UXL 75W Xe Lamp, photomultiplier 914D, and double grating emission and excitation monochromators. Fluorescence decay profiles were recorded on an FLS920 instrument. Note: considering the integrity of the spectrum, the excitation wavelength is set at 330 nm.

**Table S2** Photophysical data of  $\text{H}_3\text{-1}(\text{PF}_6)_3$ ,  $[\text{Ag}_3(\mathbf{1})_2](\text{PF}_6)_3$ , and  $[\text{Au}_3(\mathbf{1})_2](\text{PF}_6)_3$  in solution

| Sample <sup>a</sup>                          | $\lambda_{\text{abs}}/(\text{nm})$ | $\lambda_{\text{em}}/(\text{nm})$ | $\tau^b_{\text{solution}}/(\text{ns})$ | $\Phi^b_{\text{solution}}/(\%)$ |
|----------------------------------------------|------------------------------------|-----------------------------------|----------------------------------------|---------------------------------|
| $\text{H}_3\text{-1}(\text{PF}_6)_3$         | 269, 348                           | 418                               | 2.6146                                 | 21.76                           |
| $[\text{Ag}_3(\mathbf{1})_2](\text{PF}_6)_3$ | 269, 361                           | 487                               | 4.2663                                 | 19.19                           |
| $[\text{Au}_3(\mathbf{1})_2](\text{PF}_6)_3$ | 266, 349                           | 478                               | 1.4378                                 | 1.46                            |

<sup>a</sup>Solution measurements were carried out with  $10^{-5}$  M acetonitrile solutions. <sup>b</sup>Average lifetimes ( $\tau$ ), and quantum yields ( $\Phi$ ) ( $T = 298$  K).

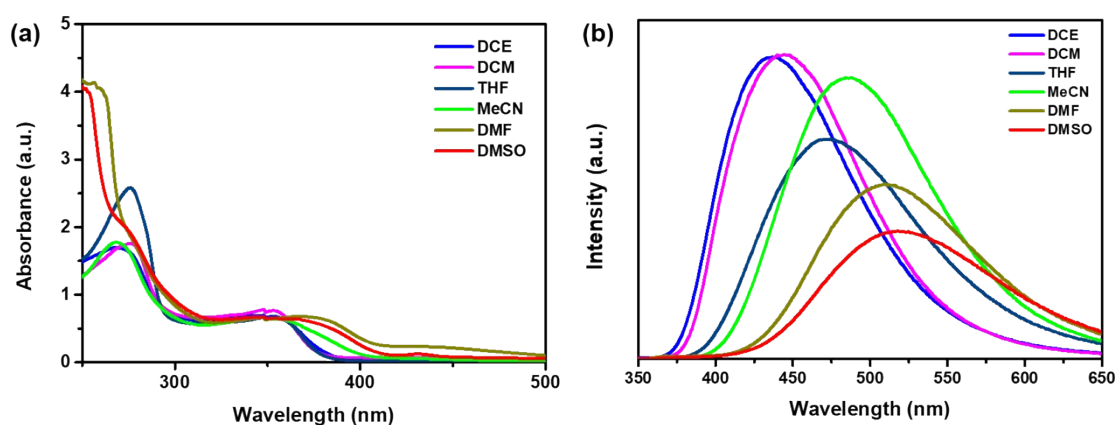

**Fig. S24** (a) UV-vis absorption and (b) fluorescence emission spectra of  $[\text{Ag}_3(\mathbf{1})_2](\text{PF}_6)_3$  in various solvents ( $\lambda_{\text{ex}} = 330$  nm,  $c = 10^{-5}$  M,  $T = 298$  K).

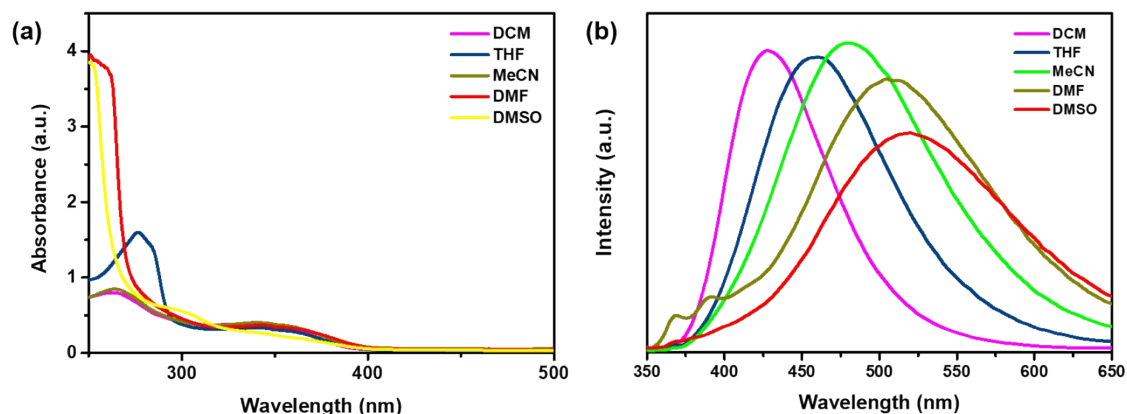

**Fig. S25** (a) UV-vis absorption and (b) fluorescence emission spectra of [Au<sub>3</sub>(1)<sub>2</sub>](PF<sub>6</sub>)<sub>3</sub> in various solvents ( $\lambda_{\text{ex}} = 330 \text{ nm}$ ,  $c = 10^{-5} \text{ M}$ ,  $T = 298 \text{ K}$ ).

## 5. DFT calculation

All calculations were performed with the Gaussian(R) 09 program optimizer<sup>S6</sup>. The theoretical approach is based on the framework of density functional theory (DFT)<sup>S7,S8</sup>. Calculations were performed using M06, UM06, and UB3LYP functional<sup>S9</sup> with the LANL2DZ basis set (Au, Ag) and the 6-31G\* basis set (H, C, N, B). Cartesian coordinates of all the optimized geometries are listed in the supporting information. Frequency calculations were carried out to ensure that the optimized geometries were minima on the potential energy surface, in which no imaginary frequencies were observed in any of the compounds.

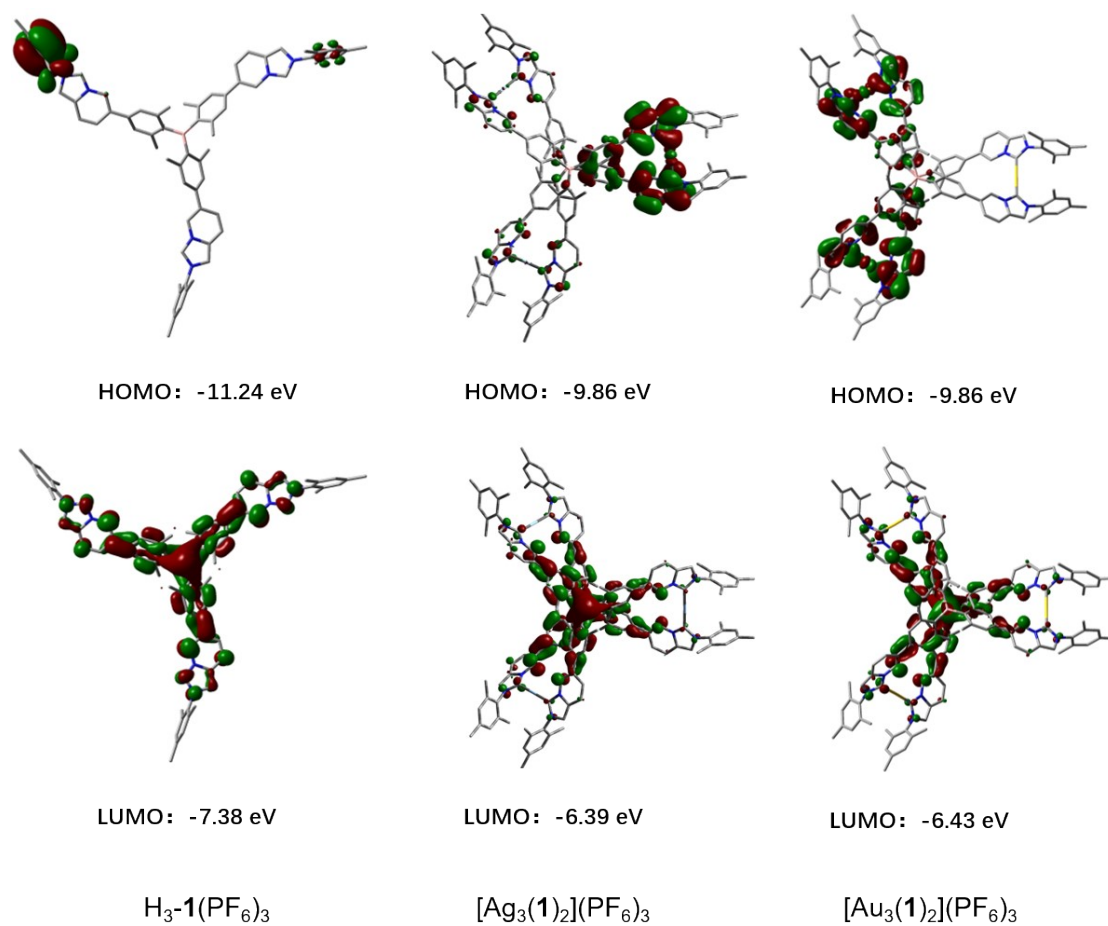

**Fig. S26** HOMO (top) and LUMO (bottom) diagrams of  $H_3-1(PF_6)_3$ ,  $[Ag_3(1)_2](PF_6)_3$ , and  $[Au_3(1)_2](PF_6)_3$ .

**Table S3.** Cartesians coordinates of calculated ( $H_3-1(PF_6)_3$ ) at the UB3LYP/LANL2DZ, 6-31G\*.

| Atom | X         | Y         | Z         | Atom | X         | Y         | Z         |
|------|-----------|-----------|-----------|------|-----------|-----------|-----------|
| C    | -3.583003 | 2.624862  | -0.283326 | C    | -0.363497 | 2.305315  | 1.710416  |
| N    | -7.254254 | 7.274095  | 0.081775  | H    | -0.052974 | 1.410676  | 2.259689  |
| N    | -5.831209 | 5.6214    | -0.028555 | H    | -0.7493   | 3.017596  | 2.445801  |
| C    | -1.410538 | 2.007694  | 0.653891  | H    | 0.540307  | 2.739102  | 1.26988   |
| C    | 0.5195    | -2.39202  | -1.221556 | C    | -1.146408 | -3.61571  | 0.659134  |
| N    | 7.793348  | 2.233678  | -0.017997 | H    | -1.756506 | -4.086116 | 1.426008  |
| C    | -1.020099 | -2.222803 | 0.662928  | C    | -6.087327 | 2.93581   | -0.588765 |
| C    | -1.276334 | 0.945497  | -0.284025 | H    | -6.163199 | 1.871798  | -0.781489 |
| C    | -2.555986 | 2.810525  | 0.649652  | C    | -5.957292 | 6.946638  | 0.205655  |
| H    | -2.65883  | 3.576436  | 1.414153  | C    | -0.478294 | -4.414308 | -0.276962 |
| C    | 2.447163  | 0.230037  | 0.662545  | C    | -4.787623 | 3.491566  | -0.292155 |
| C    | -0.170465 | -1.577974 | -0.279728 | C    | -7.212252 | 3.707054  | -0.601387 |
| C    | 1.463881  | 0.642501  | -0.280648 | H    | -8.189941 | 3.28858   | -0.813051 |

|   |           |            |           |   |           |            |           |
|---|-----------|------------|-----------|---|-----------|------------|-----------|
| C | 3.716216  | 0.818198   | 0.659549  | N | -2.688802 | -9.909939  | 0.085534  |
| H | 4.428565  | 0.525532   | 1.426691  | C | -3.444803 | 1.58939    | -1.215842 |
| C | 1.823415  | 1.648195   | -1.221762 | H | -4.210654 | 1.443008   | -1.972789 |
| C | 2.176269  | -0.820516  | 1.722878  | C | -2.327274 | 0.74881    | -1.223573 |
| H | 1.244754  | -0.637458  | 2.268145  | C | -4.68908  | 4.829951   | -0.023868 |
| H | 2.983127  | -0.840634  | 2.461514  | H | -3.758272 | 5.344024   | 0.177987  |
| H | 2.099522  | -1.822026  | 1.286972  | C | -7.10702  | 5.094758   | -0.316934 |
| N | -1.962054 | -7.853935  | -0.025225 | C | 5.601373  | 3.804813   | -0.582856 |
| C | 3.11066   | 2.194207   | -1.211371 | H | 4.719974  | 4.404764   | -0.77853  |
| H | 3.369645  | 2.928643   | -1.969313 | C | -0.631259 | -5.890141  | -0.284471 |
| C | 0.347816  | -3.779842  | -1.212171 | C | -3.050718 | -8.621703  | 0.203279  |
| H | 0.853843  | -4.371529  | -1.970371 | B | 0.006024  | 0.003571   | -0.280517 |
| C | 6.534991  | 1.64447    | -0.013715 | C | 9.002201  | 1.675987   | 0.215733  |
| H | 6.51086   | 0.58169    | 0.189629  | C | -1.843274 | -6.469416  | -0.022662 |
| C | 5.428002  | 2.402288   | -0.284076 | H | -2.753187 | -5.9168    | 0.172491  |
| N | 9.937606  | 2.631894   | 0.090484  | C | 1.438561  | -1.818236  | -2.283234 |
| C | -7.789616 | 8.617787   | 0.261115  | H | 1.698641  | -2.581719  | -3.022311 |
| C | -7.861119 | 9.459654   | -0.860827 | H | 2.371323  | -1.444535  | -1.848533 |
| C | -8.395668 | 10.735188  | -0.660611 | H | 0.983048  | -0.984556  | -2.827126 |
| H | -8.467489 | 11.407891  | -1.511135 | C | 7.979839  | 3.601184   | -0.306841 |
| C | -8.843783 | 11.167578  | 0.59394   | C | -7.986422 | 6.159302   | -0.238483 |
| C | -8.753184 | 10.282559  | 1.675527  | H | -9.054085 | 6.205255   | -0.383313 |
| H | -9.104587 | 10.60096   | 2.653399  | C | 0.867489  | 2.157603   | -2.283966 |
| C | -8.228175 | 8.994415   | 1.54105   | H | 0.375657  | 1.347159   | -2.831389 |
| C | 4.073321  | 1.796505   | -0.275836 | H | 1.399634  | 2.767176   | -3.020157 |
| C | -1.793657 | -1.461694  | 1.722909  | H | 0.075537  | 2.776889   | -1.850226 |
| H | -1.166829 | -0.75077   | 2.271201  | C | -2.288805 | -0.336431  | -2.282657 |
| H | -2.219424 | -2.150069  | 2.459011  | H | -1.342849 | -0.351905  | -2.833907 |
| H | -2.618949 | -0.889412  | 1.286754  | H | -3.086614 | -0.187656  | -3.016222 |
| H | -2.420193 | -1.331482  | -1.845384 | C | -4.092545 | -10.931548 | -2.240166 |
| C | -3.590018 | -11.041392 | 0.262202  | H | -4.419517 | -9.88451   | -2.272136 |
| C | -3.729023 | -11.58615  | 1.549162  | H | -4.68531  | -11.480804 | -2.975144 |
| C | -4.592743 | -12.676238 | 1.683654  | H | -3.048324 | -10.956861 | -2.574176 |
| H | -4.722422 | -13.118127 | 2.668053  | C | -2.989641 | -11.031719 | 2.745144  |
| C | -5.289749 | -13.214317 | 0.594289  | H | -3.284567 | -9.998519  | 2.968394  |
| C | -5.112753 | -12.62874  | -0.66554  | H | -1.90331  | -11.035398 | 2.595526  |
| H | -5.649635 | -13.033111 | -1.519547 | H | -3.200664 | -11.629666 | 3.634621  |
| C | -4.263021 | -11.537554 | -0.866119 | C | 15.583943 | 1.815237   | 0.767991  |
| C | 9.342386  | 3.8255     | -0.229112 | H | 15.78718  | 0.765095   | 1.014429  |
| H | 9.9193    | 4.724724   | -0.376033 | H | 15.987529 | 2.425322   | 1.581435  |
| C | -0.868476 | -8.699749  | -0.303013 | H | 16.139667 | 2.049058   | -0.144999 |
| C | -1.355293 | -9.991871  | -0.224305 | C | 11.50792  | 1.858461   | -2.224217 |
| H | -0.863302 | -10.941483 | -0.36313  | H | 10.769114 | 1.047136   | -2.232249 |
| C | 0.498626  | -6.74191   | -0.573271 | H | 11.000473 | 2.764903   | -2.575752 |
| H | 1.460455  | -6.279003  | -0.762431 | H | 12.276038 | 1.606618   | -2.958949 |
| C | 6.833674  | 4.389719   | -0.593472 | C | -6.189797 | -14.412433 | 0.769698  |
| H | 6.963963  | 5.444887   | -0.806704 | H | -5.622368 | -15.343446 | 0.643444  |
| C | 12.126672 | 2.04873    | -0.858493 | H | -6.997105 | -14.419849 | 0.031432  |

|   |            |           |           |   |           |            |           |
|---|------------|-----------|-----------|---|-----------|------------|-----------|
| C | 13.498603  | 1.868214  | -0.663439 | C | -4.092545 | -10.931548 | -2.240166 |
| H | 14.112055  | 1.587903  | -1.515615 | H | -4.419517 | -9.88451   | -2.272136 |
| C | 14.103302  | 2.042542  | 0.5878    | H | -4.68531  | -11.480804 | -2.975144 |
| C | 13.297798  | 2.415135  | 1.671255  | H | -3.048324 | -10.956861 | -2.574176 |
| H | 13.754206  | 2.562504  | 2.646481  | C | -2.989641 | -11.031719 | 2.745144  |
| C | 11.920187  | 2.611301  | 1.541673  | H | -3.284567 | -9.998519  | 2.968394  |
| C | 11.368542  | 2.417185  | 0.264824  | H | -1.90331  | -11.035398 | 2.595526  |
| C | 0.389319   | -8.101552 | -0.581736 | H | -3.200664 | -11.629666 | 3.634621  |
| H | 1.239776   | -8.742176 | -0.787007 | C | 15.583943 | 1.815237   | 0.767991  |
| C | 11.081096  | 3.017681  | 2.731219  | H | 15.78718  | 0.765095   | 1.014429  |
| H | 10.310873  | 2.271848  | 2.964856  | H | 15.987529 | 2.425322   | 1.581435  |
| H | 10.569554  | 3.973813  | 2.567298  | H | 16.139667 | 2.049058   | -0.144999 |
| H | 11.707322  | 3.12906   | 3.61932   | C | 11.50792  | 1.858461   | -2.224217 |
| C | -9.392624  | 12.560657 | 0.779891  | H | 10.769114 | 1.047136   | -2.232249 |
| H | -8.5892    | 13.261235 | 1.041683  | H | 11.000473 | 2.764903   | -2.575752 |
| H | -10.131887 | 12.596484 | 1.585585  | H | 12.276038 | 1.606618   | -2.958949 |
| H | -9.863602  | 12.931756 | -0.135181 | C | -6.189797 | -14.412433 | 0.769698  |
| C | -8.149665  | 8.063073  | 2.728853  | H | -5.622368 | -15.343446 | 0.643444  |
| H | -8.721873  | 7.141469  | 2.567461  | H | -6.997105 | -14.419849 | 0.031432  |
| H | -8.553468  | 8.547651  | 3.620685  | H | -6.636294 | -14.436156 | 1.768281  |
| H | -7.116649  | 7.76998   | 2.954621  | H | -4.041579 | -8.269224  | 0.440382  |
| C | -7.392038  | 9.023396  | -2.229754 | H | -5.160325 | 7.629587   | 0.451612  |
| H | -6.320509  | 8.787155  | -2.242154 | H | 9.191896  | 0.643391   | 0.460454  |
| H | -7.558805  | 9.817671  | -2.96089  |   |           |            |           |
| H | -7.926232  | 8.133118  | -2.583035 |   |           |            |           |

**Table S4.** Cartesians coordinates of calculated  $[\text{Ag}_3(\mathbf{1})_2](\text{PF}_6)_3$  at the UB3LYP/LANL2DZ, 6-31G\*.

| Atom | X         | Y         | Z         | Atom | X         | Y         | Z        |
|------|-----------|-----------|-----------|------|-----------|-----------|----------|
| Ag   | 4.520697  | 7.42717   | -0.137306 | H    | -1.128243 | -0.720587 | 1.099327 |
| Ag   | -8.815099 | 0.000762  | -0.00011  | H    | -2.828989 | -1.101074 | 0.839299 |
| C    | 0.7861    | -4.27045  | 3.406109  | H    | -1.902499 | -1.959912 | 2.075361 |
| N    | 2.87264   | -9.546974 | 1.744611  | C    | 1.764477  | -1.086196 | 1.570411 |
| N    | 2.199216  | -7.591119 | 2.32788   | H    | 1.113962  | -0.284142 | 1.210844 |
| C    | 1.097286  | -1.976343 | 2.601672  | H    | 2.080667  | -1.670395 | 0.699709 |
| C    | -2.178156 | 1.413994  | 4.624075  | H    | 2.656567  | -0.59972  | 1.982597 |
| N    | 5.515384  | 5.813236  | 2.422868  | C    | -3.759931 | 0.602386  | 2.482545 |
| C    | -2.484361 | 0.0557    | 2.631034  | H    | -4.341826 | 0.301706  | 1.615896 |
| C    | 0.276067  | -1.462384 | 3.641416  | C    | 0.125791  | -6.678714 | 3.915935 |
| C    | 1.30175   | -3.352443 | 2.480536  | H    | -0.70801  | -6.307186 | 4.498677 |
| H    | 1.86355   | -3.710022 | 1.621966  | C    | 3.131541  | -8.225698 | 1.545867 |
| C    | 0.954022  | 2.363447  | 2.893228  | C    | -4.288602 | 1.538653  | 3.382696 |
| C    | -1.629751 | 0.505465  | 3.678936  | C    | 1.00417   | -5.732828 | 3.259757 |
| C    | 1.046761  | 1.183207  | 3.692982  | C    | 0.308323  | -8.022888 | 3.802074 |

|   |            |            |           |   |            |            |           |
|---|------------|------------|-----------|---|------------|------------|-----------|
| C | 2.000157   | 3.289379   | 2.873379  | H | -0.348392  | -8.729665  | 4.297688  |
| H | 1.871016   | 4.189175   | 2.278041  | N | -9.764793  | 2.620844   | 1.434624  |
| C | 2.232461   | 1.014655   | 4.465567  | C | 0.035424   | -3.750391  | 4.469503  |
| C | -0.240199  | 2.686768   | 2.012831  | H | -0.340746  | -4.413498  | 5.241825  |
| H | -0.557124  | 1.835076   | 1.40378   | C | -0.248076  | -2.386348  | 4.583933  |
| H | 0.005105   | 3.505288   | 1.328354  | C | 2.026906   | -6.225713  | 2.496016  |
| H | -1.110408  | 2.995036   | 2.600439  | H | 2.764253   | -5.614892  | 1.992891  |
| N | -7.788988  | 2.137819   | 2.129036  | C | 1.366194   | -8.51807   | 2.991114  |
| C | 3.257876   | 1.96358    | 4.41016   | C | 5.296886   | 4.126591   | 4.605226  |
| H | 4.152544   | 1.773729   | 4.994     | H | 5.168883   | 3.501379   | 5.480182  |
| C | -3.484222  | 1.894838   | 4.473254  | C | -5.630299  | 2.143182   | 3.173336  |
| H | -3.87021   | 2.562655   | 5.237463  | C | -8.788445  | 1.683023   | 1.30634   |
| C | 4.443492   | 4.936946   | 2.495321  | B | -0.097587  | 0.080401   | 3.702186  |
| H | 3.775408   | 4.974188   | 1.645677  | C | 5.780191   | 6.731648   | 1.436815  |
| C | 4.300148   | 4.083453   | 3.555262  | C | -6.560683  | 1.542588   | 2.369847  |
| N | 6.971101   | 7.271917   | 1.811113  | H | -6.424896  | 0.585455   | 1.884895  |
| C | 3.581621   | -10.638945 | 1.109143  | C | -1.41201   | 1.849668   | 5.856213  |
| C | 4.696673   | -11.191283 | 1.760295  | H | -1.462256  | 1.08168    | 6.639415  |
| C | 5.315926   | -12.290165 | 1.156773  | H | -1.832256  | 2.766536   | 6.280833  |
| H | 6.177428   | -12.735526 | 1.648186  | H | -0.355057  | 2.029033   | 5.644761  |
| C | 4.852389   | -12.838675 | -0.044409 | C | 6.527331   | 5.809384   | 3.40742   |
| C | 3.743305   | -12.247166 | -0.660554 | C | 1.818434   | -9.757215  | 2.610868  |
| H | 3.37014    | -12.660388 | -1.594503 | H | 1.479787   | -10.746815 | 2.872916  |
| C | 3.083073   | -11.1485   | -0.1018   | C | 2.455034   | -0.160479  | 5.400349  |
| C | 3.176261   | 3.112923   | 3.614575  | H | 1.580543   | -0.368925  | 6.023504  |
| C | -2.060708  | -0.982479  | 1.609788  | H | 3.292133   | 0.044402   | 6.074573  |
| H | 2.686892   | -1.081028  | 4.85521   | H | 2.037878   | -9.497299  | -1.046179 |
| C | -1.093414  | -1.94123   | 5.760741  | C | 5.216061   | -10.633712 | 3.064829  |
| H | -0.576491  | -1.199425  | 6.381352  | H | 5.578358   | -9.605348  | 2.947863  |
| H | -1.33845   | -2.787655  | 6.409099  | H | 6.045163   | -11.240179 | 3.438047  |
| H | -2.034074  | -1.486994  | 5.433418  | H | 4.440343   | -10.615747 | 3.839208  |
| C | -11.037627 | 2.575358   | 0.74402   | C | -11.980683 | 1.265518   | 2.71602   |
| C | -11.150309 | 3.207186   | -0.505829 | H | -11.26843  | 0.432605   | 2.67911   |
| C | -12.399374 | 3.178567   | -1.132995 | H | -12.943048 | 0.868774   | 3.049021  |
| H | -12.50883  | 3.663915   | -2.099872 | H | -11.623351 | 1.961566   | 3.483989  |
| C | -13.510062 | 2.558992   | -0.547562 | C | -9.97686   | 3.902211   | -1.156562 |
| C | -13.346542 | 1.9411     | 0.69723   | H | -9.142329  | 3.212151   | -1.33058  |
| H | -14.198503 | 1.45486    | 1.165914  | H | -9.592631  | 4.719587   | -0.534569 |
| C | -12.120343 | 1.936488   | 1.369602  | H | -10.268795 | 4.327213   | -2.120342 |
| C | 7.448324   | 6.739012   | 2.992178  | C | 10.009192  | 11.246353  | -1.01763  |
| H | 8.379164   | 7.059912   | 3.43178   | H | 11.031058  | 11.264544  | -0.61762  |
| C | -8.146374  | 3.354339   | 2.749335  | H | 9.595069   | 12.252117  | -0.897638 |
| C | -9.411626  | 3.63999    | 2.296941  | H | 10.086663  | 11.032787  | -2.088876 |



|   |            |            |           |    |            |           |           |
|---|------------|------------|-----------|----|------------|-----------|-----------|
| H | -10.070273 | 4.467123   | 2.508456  | C  | 8.679393   | 6.415271  | -0.365841 |
| C | -5.980152  | 3.403682   | 3.794296  | H  | 8.995393   | 5.800538  | 0.485488  |
| H | -5.246973  | 3.907606   | 4.412088  | H  | 7.733976   | 5.99672   | -0.731206 |
| C | 6.380489   | 4.947135   | 4.529014  | H  | 9.425977   | 6.299086  | -1.155729 |
| H | 7.12957    | 4.972966   | 5.312986  | C  | -14.858006 | 2.588356  | -1.227739 |
| C | 8.536277   | 7.86974    | 0.018037  | H  | -15.408191 | 3.500757  | -0.963902 |
| C | 9.259891   | 8.858016   | -0.654559 | H  | -15.479022 | 1.738294  | -0.928175 |
| H | 9.921582   | 8.559863   | -1.464342 | H  | -14.759431 | 2.574624  | -2.317982 |
| C | 9.172401   | 10.21111   | -0.304486 | C  | 3.132972   | 8.225191  | -1.545914 |
| C | 8.31791    | 10.571621  | 0.742373  | C  | -8.78872   | -1.681567 | -1.306476 |
| H | 8.239463   | 11.617282  | 1.028858  | Ag | 4.519441   | -7.427906 | 0.137298  |
| C | 7.564624   | 9.626632   | 1.447206  | N  | 2.874275   | 9.546509  | -1.744629 |
| C | 7.691266   | 8.282461   | 1.06305   | N  | 2.200558   | 7.590769  | -2.327954 |
| C | -7.197694  | 3.983187   | 3.602792  | N  | -7.789294  | -2.136575 | -2.129095 |
| H | -7.456932  | 4.926704   | 4.070794  | N  | -9.765147  | -2.619324 | -1.434623 |
| C | 6.650407   | 10.055484  | 2.571305  | C  | 5.779101   | -6.732602 | -1.436783 |
| H | 6.868739   | 9.525496   | 3.505316  | C  | 3.583424   | 10.638336 | -1.109104 |
| H | 5.598021   | 9.86473    | 2.328462  | C  | 1.820098   | 9.756932  | -2.610877 |
| H | 6.757015   | 11.125949  | 2.763693  | C  | 2.02804    | 6.225395  | -2.496124 |
| C | 5.508485   | -14.060982 | -0.641391 | C  | 1.367673   | 8.517867  | -2.991158 |
| H | 5.388242   | -14.093245 | -1.728889 | C  | -6.560932  | -1.541489 | -2.369983 |
| H | 5.061398   | -14.97885  | -0.238425 | C  | -8.146783  | -3.35316  | -2.749208 |
| H | 6.57842    | -14.097258 | -0.412122 | C  | -11.037951 | -2.573606 | -0.743975 |
| C | 1.874098   | -10.549259 | -0.782247 | C  | -9.412061  | -3.638636 | -2.296773 |
| H | 0.986124   | -10.583778 | -0.13988  | N  | 5.514445   | -5.814134 | -2.422835 |
| H | 1.640377   | -11.093678 | -1.700944 | N  | 6.969968   | -7.272991 | -1.81103  |
| C | 4.698719   | 11.190382  | -1.760077 | H  | 1.641865   | 11.093555 | 1.70069   |
| C | 3.084821   | 11.148017  | 0.101769  | H  | 2.039095   | 9.497071  | 1.046009  |
| H | 1.481602   | 10.746591  | -2.872901 | C  | 1.302437   | 3.352226  | -2.480718 |
| C | 1.005237   | 5.732683   | -3.259891 | C  | 0.036135   | 3.750433  | -4.469646 |
| H | 2.765272   | 5.614451   | -1.992981 | H  | -0.706831  | 6.307345  | -4.498827 |
| C | 0.309744   | 8.022865   | -3.802151 | C  | -3.484466  | -1.89434  | -4.473285 |
| C | -5.630592  | -2.142292  | -3.173366 | C  | -3.760049  | -0.601658 | -2.482707 |
| H | -6.42506   | -0.584298  | -1.885168 | H  | -5.247421  | -3.906928 | -4.411861 |
| C | -7.198156  | -3.982213  | -3.602573 | H  | -12.509142 | -3.661587 | 2.100138  |
| C | -11.150646 | -3.205267  | 0.505947  | C  | -13.510305 | -2.556733 | 0.54775   |
| C | -12.120625 | -1.934668  | -1.369584 | H  | -9.142361  | -3.210662 | 1.329981  |
| H | -10.070776 | -4.465746  | -2.508166 | H  | -9.59366   | -4.718356 | 0.535025  |
| C | 4.442676   | -4.937697  | -2.495318 | H  | -10.269061 | -4.324734 | 2.120809  |
| C | 6.526437   | -5.810394  | -3.407341 | H  | -14.198697 | -1.452722 | -1.165837 |
| C | 7.447306   | -6.74013   | -2.992067 | H  | -11.267683 | -0.43197  | -2.679817 |
| C | 7.689975   | -8.283641  | -1.062957 | H  | -12.943055 | -0.866189 | -3.04865  |
| C | 5.318145   | 12.289122  | -1.156463 | H  | -11.62494  | -1.960626 | -3.484244 |

|   |            |            |           |   |            |            |           |
|---|------------|------------|-----------|---|------------|------------|-----------|
| C | 5.218335   | 10.632556  | -3.064409 | C | 3.175748   | -3.113451  | -3.614586 |
| C | 3.745245   | 12.246508  | 0.66063   | C | 5.296249   | -4.127441  | -4.60518  |
| C | 1.8756     | 10.549068  | 0.782037  | H | 7.128845   | -4.974048  | -5.312886 |
| C | 0.786921   | 4.270343   | -3.406266 | C | 9.258523   | -8.859422  | 0.654645  |
| C | 0.127018   | 6.678723   | -3.916059 | C | 8.678445   | -6.41658   | 0.365855  |
| H | -0.346866  | 8.729752   | -4.297746 | C | 8.316226   | -10.572899 | -0.742229 |
| C | -4.288821  | -1.537944  | -3.382769 | C | 6.648773   | -10.056546 | -2.571131 |
| C | -5.98056   | -3.402845  | -3.794151 | C | 5.510895   | 14.059868  | 0.641745  |
| H | -7.457472  | -4.925776  | -4.070438 | C | 1.097719   | 1.976171   | -2.601862 |
| C | -12.399679 | -3.176386  | 1.133189  | H | 1.864338   | 3.709691   | -1.62217  |
| C | -9.977277  | -3.900429  | 1.156676  | H | -0.339937  | 4.413614   | -5.241951 |
| C | -13.346775 | -1.939021  | -0.697144 | C | -0.247607  | 2.386436   | -4.5841   |
| C | -11.980963 | -1.26402   | -2.71616  | C | -2.178336  | -1.413692  | -4.624125 |
| H | 3.774555   | -4.974872  | -1.645702 | H | -3.870535  | -2.562173  | -5.237438 |
| C | 4.299483   | -4.084161  | -3.555246 | C | -2.484396  | -0.055154  | -2.631225 |
| C | 6.379744   | -4.948124  | -4.528935 | H | -4.341921  | -0.300808  | -1.6161   |
| H | 8.378119   | -7.061145  | -3.431642 | C | -14.858229 | -2.585792  | 1.22798   |
| C | 8.53507    | -7.871037  | -0.017973 | C | 1.999692   | -3.289575  | -2.873228 |
| C | 7.563093   | -9.627803  | -1.447074 | C | 3.257458   | -1.964247  | -4.410362 |
| H | 6.179828   | 12.734275  | -1.64775  | H | 5.168373   | -3.502226  | -5.480149 |
| C | 4.85457    | 12.837741  | 0.044648  | H | 9.920275   | -8.561364  | 1.464412  |
| H | 5.582087   | 9.604775   | -2.946756 | C | 9.170794   | -10.212507 | 0.304614  |
| H | 6.046505   | 11.239836  | -3.438378 | H | 8.994791   | -5.801976  | -0.48544  |
| H | 4.44238    | 10.612934  | -3.838495 | H | 7.733047   | -5.997777  | 0.730975  |
| H | 3.372053   | 12.659822  | 1.594527  | H | 9.424879   | -6.300527  | 1.155905  |
| H | 0.987733   | 10.583785  | 0.139533  | H | 8.237594   | -11.618554 | -1.028687 |
| H | 6.866905   | -9.526355  | -3.505073 | H | 2.65602    | 0.598284   | -1.983085 |
| H | 5.596397   | -9.865969  | -2.328101 | H | -0.5759    | 1.200083   | -6.381894 |
| H | 6.755481   | -11.126964 | -2.763733 | H | -1.33839   | 2.788068   | -6.408954 |
| H | 5.390413   | 14.092201  | 1.729215  | H | -2.033451  | 1.486822   | -5.433642 |
| H | 5.064186   | 14.977862  | 0.238644  | H | -1.461148  | -1.081199  | -6.639003 |
| H | 6.580896   | 14.095812  | 0.412722  | H | -1.833252  | -2.7658    | -6.281396 |
| C | 0.276375   | 1.462369   | -3.641604 | H | -0.355498  | -2.030289  | -5.644291 |
| C | 1.764681   | 1.085853   | -1.570604 | H | -1.128274  | 0.72109    | -1.099498 |
| C | -1.092991  | 1.941487   | -5.760937 | H | -2.828973  | 1.101923   | -0.83968  |
| C | -1.629828  | -0.505143  | -3.679053 | H | -1.902215  | 1.960429   | -2.075771 |
| C | -1.412153  | -1.849618  | -5.85615  | C | 1.046561   | -1.183373  | -3.693071 |
| C | -2.060642  | 0.983086   | -1.610082 | C | -0.24048   | -2.686406  | -2.012538 |
| H | -15.409523 | -3.497028  | 0.962435  | C | 2.454874   | 0.159819   | -5.400765 |
| H | -15.478277 | -1.734434  | 0.930068  | H | 11.028953  | -11.267065 | 0.616901  |
| H | -14.759556 | -2.574219  | 2.318231  | H | 9.592494   | -12.253438 | 0.898687  |
| C | 0.953711   | -2.363474  | -2.893118 | H | 10.085909  | -11.033722 | 2.088781  |
| H | 1.870448   | -4.189244  | -2.277722 | H | -0.55688   | -1.834636  | -1.403293 |

|   |           |            |           |   |          |           |           |
|---|-----------|------------|-----------|---|----------|-----------|-----------|
| C | 2.232204  | -1.01515   | -4.465802 | H | 0.004605 | -3.505112 | -1.328203 |
| H | 4.152082  | -1.774624  | -4.994338 | H | -1.11094 | -2.994205 | -2.59999  |
| C | 10.007426 | -11.247893 | 1.017734  | H | 1.580418 | 0.368171  | -6.024006 |
| B | -0.097587 | -0.080343  | -3.702309 | H | 3.292002 | -0.045194 | -6.074912 |
| H | 1.113548  | 0.284628   | -1.21027  | H | 2.686718 | 1.080451  | -4.855766 |
| H | 2.08194   | 1.670138   | -0.700351 |   |          |           |           |

**Table S5.** Cartesians coordinates of calculated ( $[\text{Au}_3(\mathbf{1})_2](\text{PF}_6)_3$ ) at the UB3LYP/LANL2DZ, 6-31G\*.

| Atom | X         | Y         | Z         | Atom | X         | Y         | Z         |
|------|-----------|-----------|-----------|------|-----------|-----------|-----------|
| C    | -0.830495 | 4.284154  | 3.36246   | C    | -2.219428 | -1.007051 | 4.440704  |
| N    | -2.933742 | 9.540134  | 1.634544  | C    | 0.287946  | -2.677534 | 2.022214  |
| N    | -2.253906 | 7.585839  | 2.239284  | H    | 0.607304  | -1.828906 | 1.410369  |
| C    | -1.114669 | 1.981267  | 2.573365  | H    | 0.054754  | -3.502661 | 1.341566  |
| C    | 2.204419  | -1.355816 | 4.61414   | H    | 1.153113  | -2.976525 | 2.621946  |
| N    | -5.450656 | -5.830445 | 2.367646  | N    | 7.801234  | -2.048073 | 2.078915  |
| C    | 2.490265  | -0.004983 | 2.613121  | C    | -3.240737 | -1.959694 | 4.375083  |
| C    | -0.287777 | 1.483396  | 3.616598  | H    | -4.141482 | -1.770309 | 4.949267  |
| C    | -1.335067 | 3.354004  | 2.442893  | C    | 3.515607  | -1.822738 | 4.462839  |
| H    | -1.901672 | 3.698228  | 1.582209  | H    | 3.910312  | -2.482411 | 5.229663  |
| C    | -0.917816 | -2.354328 | 2.886761  | C    | -4.375316 | -4.959607 | 2.460343  |
| C    | 1.643154  | -0.459519 | 3.664983  | H    | -3.674142 | -5.025958 | 1.640274  |
| C    | -1.025766 | -1.170488 | 3.679695  | C    | -4.270148 | -4.080498 | 3.50419   |
| C    | -1.959874 | -3.28458  | 2.857538  | N    | -6.898861 | -7.295784 | 1.73219   |
| H    | -1.818922 | -4.184751 | 2.265802  | C    | -3.631259 | 10.63019  | 0.980777  |
| C    | -4.763    | 11.178708 | 1.60425   | H    | 0.389239  | -1.982158 | 5.641766  |
| C    | -5.361171 | 12.284798 | 0.992009  | C    | -6.501173 | -5.797071 | 3.308768  |
| H    | -6.234605 | 12.729081 | 1.462698  | C    | -1.903744 | 9.758064  | 2.525611  |
| C    | -4.863256 | 12.840205 | -0.191716 | H    | -1.580965 | 10.751202 | 2.793788  |
| C    | -3.740456 | 12.248085 | -0.782712 | C    | -2.456279 | 0.167304  | 5.372983  |
| H    | -3.342167 | 12.664676 | -1.704707 | H    | -1.584235 | 0.387954  | 5.995198  |
| C    | -3.098819 | 11.144215 | -0.213851 | H    | -3.290421 | -0.046708 | 6.048074  |
| C    | -3.146873 | -3.109809 | 3.581807  | H    | -2.7003   | 1.083663  | 4.826021  |
| C    | 2.052921  | 1.02288   | 1.587214  | C    | 1.072073  | 1.991765  | 5.73509   |
| H    | 1.120217  | 0.749979  | 1.083189  | H    | 0.562617  | 1.248196  | 6.359768  |
| H    | 2.816531  | 1.142815  | 0.812349  | H    | 1.306344  | 2.845167  | 6.378233  |
| H    | 1.888856  | 2.00202   | 2.047274  | H    | 2.018452  | 1.546318  | 5.412151  |
| C    | -1.771738 | 1.077133  | 1.548028  | C    | 11.026352 | -2.502509 | 0.624793  |
| H    | -1.114303 | 0.276399  | 1.198719  | C    | 11.101287 | -3.168614 | -0.610172 |
| H    | -2.089113 | 1.650934  | 0.670928  | C    | 12.333535 | -3.166614 | -1.269488 |
| H    | -2.661922 | 0.588328  | 1.961646  | H    | 12.414475 | -3.677997 | -2.22566  |

|   |           |           |           |   |           |            |           |
|---|-----------|-----------|-----------|---|-----------|------------|-----------|
| C | 3.771592  | -0.537709 | 2.464595  | C | 13.463521 | -2.540313  | -0.729237 |
| H | 4.347716  | -0.233965 | 1.595342  | C | 13.335579 | -1.885428  | 0.500279  |
| C | -0.209809 | 6.701433  | 3.876945  | H | 14.202515 | -1.392676  | 0.933322  |
| H | 0.614997  | 6.342255  | 4.479555  | C | 12.126552 | -1.85044   | 1.202972  |
| C | -3.169518 | 8.215354  | 1.434868  | C | -7.413863 | -6.728796  | 2.879565  |
| C | 4.31288   | -1.463715 | 3.367979  | H | -8.364468 | -7.030578  | 3.289104  |
| C | -1.062644 | 5.743533  | 3.204936  | C | 8.178446  | -3.25387   | 2.70569   |
| C | -0.404718 | 8.043047  | 3.755327  | C | 9.436769  | -3.539193  | 2.232798  |
| H | 0.232066  | 8.75893   | 4.263592  | H | 10.103178 | -4.360653  | 2.441612  |
| N | 9.771576  | -2.531839 | 1.350915  | C | 6.029637  | -3.305449  | 3.78603   |
| C | -0.076063 | 3.779123  | 4.430594  | H | 5.310964  | -3.807399  | 4.422128  |
| H | 0.291378  | 4.450241  | 5.19997   | C | -6.392403 | -4.910621  | 4.415111  |
| C | 0.223555  | 2.419325  | 4.554097  | H | -7.172006 | -4.91441   | 5.169093  |
| C | -2.073143 | 6.221883  | 2.415381  | C | -8.408    | -7.91212   | -0.101076 |
| H | -2.792823 | 5.604123  | 1.896167  | C | -9.130046 | -8.903955  | -0.770102 |
| C | -1.448528 | 8.523878  | 2.918799  | H | -9.759204 | -8.614876  | -1.60854  |
| C | -5.307037 | -4.095189 | 4.5152    | C | -9.080946 | -10.248486 | -0.381679 |
| H | -5.210707 | -3.451656 | 5.380593  | C | -8.264657 | -10.597953 | 0.699073  |
| C | 5.65909   | -2.056757 | 3.153721  | H | -8.21365  | -11.637389 | 1.012969  |
| C | 8.785492  | -1.604263 | 1.233726  | C | -7.514735 | -9.649481  | 1.402579  |
| B | 0.105663  | -0.054382 | 3.68654   | C | -7.606347 | -8.314101  | 0.981111  |
| C | -5.688834 | -6.77323  | 1.398729  | C | 7.248955  | -3.877703  | 3.583329  |
| C | 6.572657  | -1.457072 | 2.330352  | H | 7.523556  | -4.812605  | 4.059646  |
| H | 6.424266  | -0.508016 | 1.834281  | C | -6.636957 | -10.065047 | 2.559836  |
| C | 1.445305  | -1.793396 | 5.849889  | H | -6.877095 | -9.516999  | 3.478116  |
| H | 1.491188  | -1.022148 | 6.630151  | H | -5.577127 | -9.88629   | 2.341579  |
| H | 1.873966  | -2.705281 | 6.276836  | H | -6.757779 | -11.131009 | 2.768126  |
| C | -5.497314 | 14.068979 | -0.799058 | C | 6.552863  | 1.513567   | -2.332754 |
| H | -5.396702 | 14.077806 | -1.889163 | C | 8.13789   | 3.331318   | -2.696164 |
| H | -5.017081 | 14.981352 | -0.422615 | C | 10.995942 | 2.593026   | -0.623721 |
| H | -6.561195 | 14.138866 | -0.551172 | C | 9.393181  | 3.627625   | -2.2218   |
| C | -1.879201 | 10.539337 | -0.869192 | N | -5.506381 | 5.783307   | -2.361038 |
| H | -1.008227 | 10.552396 | -0.203132 | N | -6.965186 | 7.23701    | -1.723158 |
| H | -1.613845 | 11.093776 | -1.773164 | C | -4.68057  | -11.211364 | -1.606994 |
| H | -2.052519 | 9.494121  | -1.153286 | C | -3.009359 | -11.174302 | 0.204602  |
| C | -5.329049 | 10.604396 | 2.881358  | H | -1.500847 | -10.763048 | -2.802567 |
| H | -5.746823 | 9.603716  | 2.716836  | C | -1.021635 | -5.751227  | -3.210634 |
| H | -6.129742 | 11.240923 | 3.266498  | H | -2.750166 | -5.626236  | -1.898204 |
| H | -4.568014 | 10.514021 | 3.664801  | C | -0.347004 | -8.045166  | -3.763986 |
| C | 12.02407  | -1.121569 | 2.522114  | C | 5.632138  | 2.108793   | -3.151326 |
| H | 11.425181 | -0.207416 | 2.426142  | H | 6.415451  | 0.559403   | -1.843314 |
| H | 13.016333 | -0.83177  | 2.877311  | C | 7.200921  | 3.950625   | -3.569058 |
| H | 11.557171 | -1.737199 | 3.299013  | C | 11.064917 | 3.23349    | 0.624667  |

|   |            |            |           |   |           |            |           |
|---|------------|------------|-----------|---|-----------|------------|-----------|
| C | 9.904347   | -3.864956  | -1.214383 | C | 12.102916 | 1.967128   | -1.217998 |
| H | 9.07609    | -3.166587  | -1.385503 | H | 10.049681 | 4.458541   | -2.4245   |
| H | 9.524978   | -4.66279   | -0.564537 | C | -4.423306 | 4.922447   | -2.456161 |
| H | 10.167451  | -4.316509  | -2.174373 | C | -6.55945  | 5.739453   | -3.298833 |
| C | -9.916719  | -11.286199 | -1.092397 | C | -7.478816 | 6.663924   | -2.868142 |
| H | -10.945304 | -11.287151 | -0.709477 | C | -7.678407 | 8.25103    | -0.971709 |
| H | -9.515967  | -12.294366 | -0.948909 | C | -5.270548 | -12.322589 | -0.996174 |
| H | -9.973786  | -11.089309 | -2.168048 | C | -5.254372 | -10.635672 | -2.879989 |
| C | -8.502347  | -6.467096  | -0.531805 | C | -3.643077 | -12.28337  | 0.7723    |
| H | -8.813423  | -5.815805  | 0.29377   | C | -1.79004  | -10.565618 | 0.857025  |
| H | -7.538468  | -6.090849  | -0.895539 | C | -0.801567 | -4.289937  | -3.36767  |
| H | -9.232312  | -6.354411  | -1.337588 | C | -0.162756 | -6.701988  | -3.885052 |
| C | 14.793549  | -2.6005    | -1.441829 | H | 0.294193  | -8.755721  | -4.274178 |
| H | 15.334432  | -3.51936   | -1.18121  | C | 4.292201  | 1.502834   | -3.368057 |
| H | 15.436033  | -1.757875  | -1.167831 | C | 5.988135  | 3.365853   | -3.775336 |
| H | 14.668129  | -2.597384  | -2.529455 | H | 7.46464   | 4.891889   | -4.038958 |
| C | -3.10539   | -8.240471  | -1.437725 | C | 12.298786 | 3.231872   | 1.281712  |
| C | 8.764555   | 1.678015   | -1.236773 | C | 9.861041  | 3.902967   | 1.245092  |
| N | -2.860097  | -9.563256  | -1.639182 | C | 13.312364 | 1.999874   | -0.516658 |
| N | -2.196352  | -7.603374  | -2.24361  | C | 12.003961 | 1.274215   | -2.556545 |
| N | 7.774812   | 2.116687   | -2.077963 | H | -3.720048 | 4.99689    | -1.638588 |
| N | 9.73978    | 2.617826   | -1.347422 | C | -4.31329  | 4.042989   | -3.499193 |
| C | -5.749762  | 6.725248   | -1.392639 | C | -6.446129 | 4.852444   | -4.404268 |
| C | -3.549156  | -10.659099 | -0.986176 | H | -8.433222 | 6.956935   | -3.275197 |
| C | -1.830416  | -9.772617  | -2.532654 | C | -8.473166 | 7.844749   | 0.11392   |
| C | -2.02667   | -6.237976  | -2.419227 | C | -7.598152 | 9.586408   | -1.395518 |
| C | -1.385313  | -8.534674  | -2.925634 | H | -6.143499 | -12.769867 | -1.464902 |
| C | -4.765038  | -12.879394 | 0.183692  | H | -9.824172 | 8.539787   | 1.625143  |
| H | -5.674882  | -9.6369    | -2.710941 | C | -9.162575 | 10.176449  | 0.393278  |
| H | -6.0545    | -11.273967 | -3.263377 | H | -8.864786 | 5.744835   | -0.275731 |
| H | -4.497058  | -10.540521 | -3.666491 | H | -7.586696 | 6.031252   | 0.907517  |
| H | -3.23904   | -12.700815 | 1.691408  | H | -9.280501 | 6.28304    | 1.356572  |
| H | -0.920153  | -10.577807 | 0.189498  | H | -8.310453 | 11.56966   | -1.006454 |
| H | -1.521909  | -11.118285 | 1.761259  | H | -6.968595 | 9.457005   | -3.473671 |
| H | -1.965019  | -9.52038   | 1.13994   | H | -5.665834 | 9.833875   | -2.342844 |
| C | -1.312656  | -3.364632  | -2.446845 | H | -6.855301 | 11.071834  | -2.764567 |
| C | -0.05255   | -3.777919  | -4.436323 | H | -5.283993 | -14.126273 | 1.878831  |
| H | 0.657904   | -6.335987  | -4.489205 | H | -4.907642 | -15.022133 | 0.406725  |
| C | 3.492232   | 1.856291   | -4.462776 | H | -6.455013 | -14.1875   | 0.546571  |
| C | 3.759627   | 0.569883   | -2.466758 | C | -0.282631 | -1.484549  | -3.620504 |
| H | 5.263369   | 3.863747   | -4.407758 | C | -1.767385 | -1.092431  | -1.549596 |
| H | 12.375746  | 3.724109   | 2.248193  | C | 1.079343  | -1.979831  | -5.740513 |
| C | 13.434712  | 2.629999   | 0.726687  | C | 1.632367  | 0.474212   | -3.667843 |

|   |            |            |           |    |            |           |           |
|---|------------|------------|-----------|----|------------|-----------|-----------|
| H | 9.045929   | 3.188873   | 1.414542  | C  | 1.422607   | 1.8096    | -5.850587 |
| H | 9.463753   | 4.701032   | 0.606393  | C  | 2.055313   | -1.008001 | -1.592404 |
| H | 10.123458  | 4.348456   | 2.208108  | H  | 15.306345  | 3.608292  | 1.176785  |
| H | 14.184026  | 1.526005   | -0.96106  | H  | 15.407525  | 1.84701   | 1.162977  |
| H | 11.329292  | 0.410839   | -2.510813 | H  | 14.641226  | 2.686198  | 2.525761  |
| H | 12.985324  | 0.914484   | -2.875806 | C  | -0.944413  | 2.347095  | -2.887693 |
| H | 11.62341   | 1.942852   | -3.337462 | H  | -1.86128   | 4.168523  | -2.263889 |
| C | -3.181187  | 3.082775   | -3.579301 | C  | -2.235452  | 0.989471  | -4.441408 |
| C | -5.353646  | 4.046862   | -4.506766 | H  | -4.164861  | 1.735528  | -4.947096 |
| H | -7.228103  | 4.848078   | -5.155786 | C  | -10.003444 | 11.209083 | 1.105387  |
| C | -9.200262  | 8.83222    | 0.783952  | B  | 0.098236   | 0.056408  | -3.689613 |
| C | -8.554919  | 6.399772   | 0.547411  | H  | -1.117759  | -0.284333 | -1.202777 |
| C | -8.352711  | 10.530336  | -0.690888 | H  | -2.075623  | -1.669196 | -0.671176 |
| C | -6.727582  | 10.006628  | -2.55654  | H  | -2.664263  | -0.613639 | -1.96056  |
| C | -5.390215  | -14.113558 | 0.789307  | H  | 0.562373   | -1.241303 | -6.365035 |
| C | -1.103935  | -1.990015  | -2.576598 | H  | 1.321814   | -2.83087  | -6.383761 |
| H | -1.875151  | -3.714122  | -1.585582 | H  | 2.0214     | -1.525076 | -5.417889 |
| H | 0.319802   | -4.445383  | -5.206529 | H  | 1.471639   | 1.038037  | -6.630327 |
| C | 0.235505   | -2.415569  | -4.559167 | H  | 1.845651   | 2.723546  | -6.278695 |
| C | 2.185659   | 1.377159   | -4.61547  | H  | 0.365774   | 1.992577  | -5.641091 |
| H | 3.881294   | 2.521104   | -5.228082 | H  | 1.121455   | -0.743196 | -1.086169 |
| C | 2.48332    | 0.0255     | -2.616561 | H  | 2.821086   | -1.123993 | -0.81909  |
| H | 4.338554   | 0.270247   | -1.597932 | H  | 1.89778    | -1.987215 | -2.054496 |
| C | 14.765399  | 2.68965    | 1.438086  | C  | -1.042578  | 1.162877  | -3.681413 |
| C | -1.994868  | 3.267736   | -2.856366 | C  | 0.259556   | 2.680512  | -2.024577 |
| C | -3.265338  | 1.932673   | -4.373641 | C  | -2.462749  | -0.185889 | -5.374825 |
| H | -5.254431  | 3.403107   | -5.371655 | H  | -11.032474 | 11.204308 | 0.723683  |
| H | -9.608652  | 12.219588  | 0.961769  | H  | -3.298519  | 0.022094  | -6.049794 |
| H | -10.058058 | 11.011475  | 2.181021  | H  | -2.699545  | -1.104694 | -4.828774 |
| H | 0.586563   | 1.834676   | -1.412926 | Au | -4.426585  | -7.446799 | -0.077245 |
| H | 0.020433   | 3.503895   | -1.343879 | Au | -4.488456  | 7.410449  | 0.078762  |
| H | 1.121566   | 2.986257   | -2.625433 | Au | 8.767795   | 0.034978  | -0.004061 |
| H | -1.588957  | -0.399002  | -5.997179 |    |            |           |           |

## 6. F<sup>-</sup> binding investigations

In order to determine the bind ratio between  $[\text{Au}_3(\mathbf{1})_2](\text{PF}_6)_3$  and TBAF, the analysis of UV-vis absorption spectroscopic data was carried out using a nonlinear least-squares curve fitting procedure performed with the online software Bindfit (<http://supramolecular.org/>) with a 1:2 global fitting modelS6 (Nelder-Mead method) S10,S11. A solution of  $[\text{Au}_3(\mathbf{1})_2](\text{PF}_6)_3$  (3 mL,  $1 \times 10^{-5}$  M in  $\text{CH}_3\text{CN}$ ) was placed in the colorimetric dish and was titrated with incremental amounts of fluoride anions by addition 2.5  $\mu\text{L}$  of solution of *n*-Bu<sub>4</sub>NF in  $\text{CH}_3\text{CN}$  ( $3 \times 10^{-3}$  M), which represents 4 equivalents of  $[\text{Au}_3(\mathbf{1})_2](\text{PF}_6)_3$ . The emission at 349 nm was monitored.

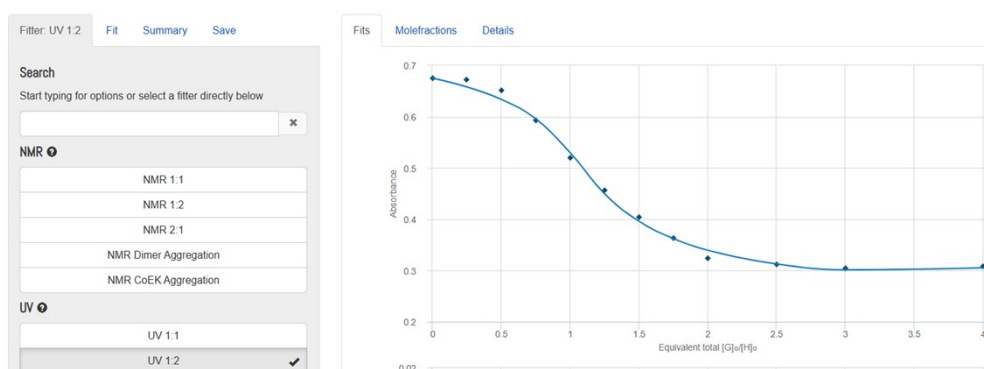

**Fig. S27** Fitted binding isotherm of  $[\text{Au}_3(\mathbf{1})_2](\text{PF}_6)_3$  with TBAF showing the change in the chemical shift for the UV-vis absorption signal at 349 ppm upon addition of fluoride and the fitted isotherm obtained using a 1:2 binding model.

### Job plot of $[\text{Au}_3(\mathbf{1})_2](\text{PF}_6)_3$ with fluoride ions

Maintaining the total concentration of  $[\text{Au}_3(\mathbf{1})_2](\text{PF}_6)_3$  and fluoride anions at  $1 \times 10^{-5}$  M, a series of solutions of  $[\text{Au}_3(\mathbf{1})_2](\text{PF}_6)_3$  and fluoride anions in varying proportions was sampled. A full set of fluorescence spectra was measured monitoring fluorescence intensity at  $\lambda_{\text{em}} = 478$  nm ( $\lambda_{\text{ex}} = 330$  nm).

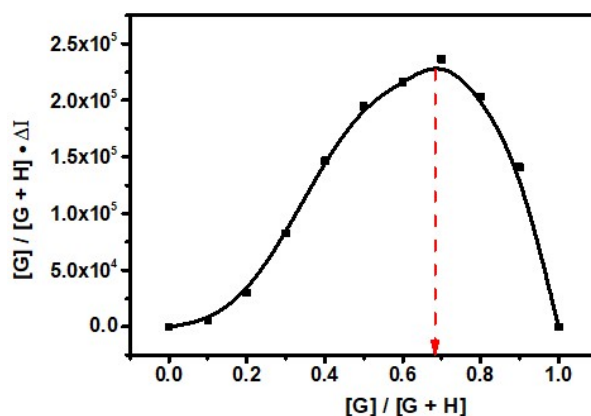

**Fig. S28** Job plot of  $[\text{Au}_3(\mathbf{1})_2](\text{PF}_6)_3$  with TBAF in  $\text{CH}_3\text{CN}$  at 298 K. G: TBAF; H:  $[\text{Au}_3(\mathbf{1})_2](\text{PF}_6)_3$ .

## 7. References

- (1) F. Rauch, P. Endres, A. Friedrich, D. Sieh, M. Hähnel, I. Krummenacher, H. Braunschweig, M. Finze, L. Ji and T. B. Marder, *Chem. – Eur. J.*, 2020, **26**, 12951–12963.
- (2) N. Mihara, T. K. Ronson and J. R. Nitschke, *Angew. Chem., Int. Ed.*, 2019, **58**, 12497–12501.
- (3) O. V. Dolomanov, L. J. Bourhis, R. J. Gildea, J. A. K. Howard and H. J. Puschmann, *Appl. Cryst.*, 2009, **42**, 339–341.
- (4) L. J. Bourhis, O. V. Dolomanov, R. J. Gildea, J. A. K. Howard and H. Puschmann, *Acta Cryst.*, 2015, **A71**, 59–75.
- (5) G. M. Sheldrick, *Acta Cryst.*, 2015, **C71**, 3–8.
- (6) R. B. Gaussian 09, M. J. Frisch, G. W. Trucks, H. B. Schlegel, G. E. Scuseria, M. A. Robb, J. R. Cheeseman, G. Scalmani, V. Barone, G. A. Petersson, H. Nakatsuji, X. Li, M. Caricato, A. Marenich, J. Bloino, B. G. Janesko, R. Gomperts, B. Mennucci, H. P. Hratchian, J. V. Ortiz, A. F. Izmaylov, J. L. Sonnenberg, D. Williams-Young, F. Ding, F. Lipparini, F. Egidi, J. Goings, B. Peng, A. Petrone, T. Henderson, D. Ranasinghe, V. G. Zakrzewski, J. Gao, N. Rega, G. Zheng, W. Liang, M. Hada, M. Ehara, K. Toyota, R. Fukuda, J. Hasegawa, M. Ishida, T. Nakajima, Y. Honda, O. Kitao, H. Nakai, T. Vreven, K. Throssell, J. A. Montgomery, Jr., J. E. Peralta, F. Ogliaro, M.



Bearpark, J. J. Heyd, E. Brothers, K. N. Kudin, V. N. Staroverov, T. Keith, R. Kobayashi, J. Normand, K. Raghavachari, A. Rendell, J. C. Burant, S. S. Iyengar, J. Tomasi, M. Cossi, J. M. Millam, M. Klene, C. Adamo, R. Cammi, J. W. Ochterski, R. L. Martin, K. Morokuma, O. Farkas, J. B. Foresman, and D. J. Fox, Gaussian, Inc., Wallingford CT, 2016.

(7) P. Hohenberg, W. Kohn, *Phys. Rev. B.*, 1964, **136**, B864–B871.

(8) W. Kohn, L. Sham, *J. Phys. Rev.*, 1965, **140**, A1133–A1138.

(9) Y. Zhao, D. G. Truhlar, *Theor. Chem. Acc.*, 2008, **120**, 215–241.

(10) P. Thordarson, *Chem. Soc. Rev.*, 2011, 40, 1305–1323.

(11) M. Kazem-Rostami, A. Orte, A. M. Ortuño, A. H. G. David, I. Roy, D. Miguel, A. Garcí, C. M. Cruz, C. L. Stern, J. M. Cuerva, J. F. Stoddart, *J. Am. Chem. Soc.*, 2022, **144**, 9380–9389.
